# Supplementary material for: Selective α-oxidation of amides via visible-light-driven iron catalysis
Source: Royal Society of Chemistry journal article supplement (doi:10.1039/d3ob01984e), 2024-01-01

## Supporting Information

### Selective $\alpha$ -oxidation of amides via visible-light-driven Iron-catalysis

*Shu-Hong Liu, Zhi-Chao Dong, Zhong-Lin Zang, Cheng-He Zhou and Gui-Xin Cai\**

#### Contents

|                                              |     |
|----------------------------------------------|-----|
| 1. General Information.....                  | S2  |
| 2. Synthesis of Starting Materials .....     | S3  |
| 3. Optimization of Reaction Conditions ..... | S14 |
| 4. Experimental Procedures .....             | S16 |
| 5. Mechanistic Studies .....                 | S19 |
| 6. References.....                           | S22 |
| 7. Experimental Spectra .....                | S23 |

---

## 1. General Information

Reagents and solvents were obtained from commercial suppliers and used without further purification unless otherwise indicated. The reactions were detected by analytical thin layer chromatography (TLC) on Yinlong silica gel HSGF254 plates ( $0.2 \pm 0.03$  mm), appeared by ultraviolet light or by appropriate staining with alkaline potassium permanganate solutions.  $^1\text{H}$  NMR spectra were obtained on Bruker Avance 600MR spectrometer at ambient temperature. The data marking mode as follows: chemical shift on the  $\delta$  scale using residual proton solvent as internal standard [ $\delta$  7.26 ( $\text{CDCl}_3$ ) ppm; TMS: 0.00 ppm], multiplicity (s = singlet, d = doublet, t = triplet, q = quartet, m = multiplet, dd = doublet of doublets), integration, and coupling constant ( $J$ ) in hertz (Hz). The photochemical reactions were performed with 30 W blue LEDs (Leishi lighting). High resolution mass spectra were obtained on a Bruker impact II spectrometer. Mettler toledo electronic balance is used for reaction feeding, which model is ME204E/02 produced by Shanghai Mettler-Toledo Instrument Co., Ltd. Its maximum weighing is 220 g, and the actual scale is 0.1 mg. Electron paramagnetic Resonance Spectrometer is used for mechanistic study, which model is EMXplus-9.5/12 produced by Bruker. UV spectra were recorded at room temperature on a TU-2450 spectrophotometer (Puxi Analytic Instrument Ltd. of Beijing, China) equipped with 1.0 cm quartz cells.

## 2. Synthesis of Starting Materials

### 2.1 General procedure A for amide synthesis<sup>1</sup>

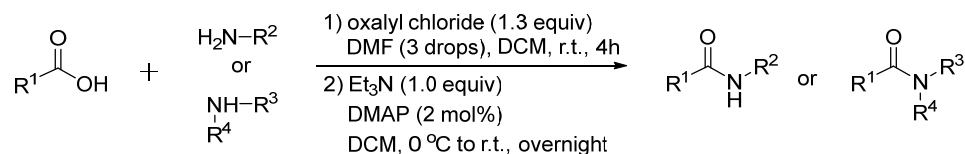

To a 100 mL oven-dried round-bottom flask equipped with a Teflon-coated magnetic stir bar was added benzoic acid (1.0 equiv.). The flask was backfilled with N<sub>2</sub> three times before adding DCM (0.2 M) and cooling to 0 °C in an ice bath. Oxalyl chloride (1.3 equiv.) was then added followed by DMF (3-5 drops). The reaction was then allowed to warm to room temperature and stirred for 4 hours. The reaction was then concentrated under reduced pressure and the residue was then taken up in fresh DCM (0.2 M) and cooled to 0 °C. Et<sub>3</sub>N (1.0 equiv.) was added dropwise followed by amine (1.0 equiv.) and DMAP (0.02 equiv.). The reaction was then allowed to warm to room temperature and stirred overnight. The reaction was quenched with 10 mL H<sub>2</sub>O and 25 mL DCM and the organics were washed with 1M HCl (25 mL × 2), 1M NaOH (25 mL × 2) and 25 mL brine, then dried with anhydrous Na<sub>2</sub>SO<sub>4</sub>. The solvent was removed by rotary evaporation and the crude reaction mixture was purified by silica gel chromatography, eluting with petroleum ether/EtOAc.

### 2.2 General procedure B for amide synthesis<sup>2</sup>

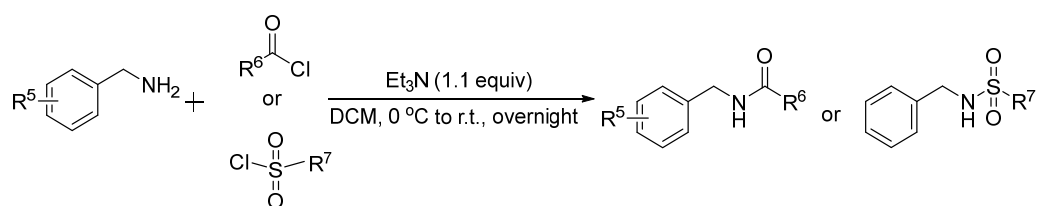

To a stirring of benzylamine (1.0 equiv.), Et<sub>3</sub>N (1.1 equiv.) in CH<sub>2</sub>Cl<sub>2</sub> (45 mL), was added acid chloride (1.1 equiv.) at 0 °C (ice/water bath). The reaction mixture was stirred at 0 °C for 10 minutes. Then, the reaction mixture was stirred at room temperature overnight. After the completion, the mixture was washed with saturated NaHCO<sub>3</sub> solution (3 times) and brine, and dried with anhydrous Na<sub>2</sub>SO<sub>4</sub>. The solvent was removed by rotary evaporation and the crude reaction mixture was purified by silica gel chromatography, eluting with petroleum ether/EtOAc.

### 2.3 General procedure C for amide synthesis<sup>3</sup>

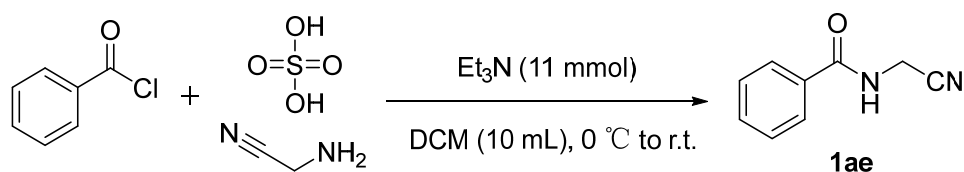

To a stirring of aminoacetonitrile sulfate (5 mmol) and triethylamine (11 mmol) in  $\text{CH}_2\text{Cl}_2$  (10 mL), was added benzoyl chloride (11 mmol) at  $0\text{ }^\circ\text{C}$  (ice/water bath). The reaction mixture was stirred at  $0\text{ }^\circ\text{C}$  for 1h. Then, the reaction mixture was stirred at room temperature for 2 h. After the completion, the solvent was removed by rotary evaporation and the crude reaction mixture was purified by silica gel chromatography, eluting with petroleum ether/EtOAc.

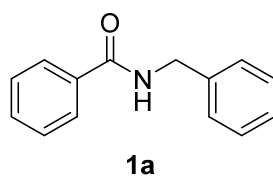

**N-benzylbenzamide (1a)** [1485-70-7]: **1a** was purchased from Bide Pharmaceutical.

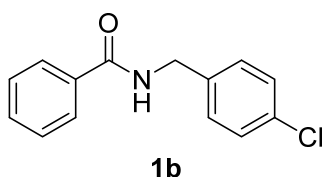

**N-(4-chlorobenzyl)benzamide (1b)**<sup>4</sup>: According to the procedure **A**, the title compound **1b** was obtained as white solid (0.55 g, isolated yield: 55%).  $R_f = 0.50$  (silica gel, petroleum ether/EtOAc = 3:1). Melting Point:  $142\text{-}144\text{ }^\circ\text{C}$  (reported melting point:  $142\text{-}143\text{ }^\circ\text{C}$ ).

$^1\text{H NMR}$  (600 MHz,  $\text{CDCl}_3$ )  $\delta$  7.69 (d,  $J = 7.6\text{ Hz}$ , 2H), 7.41 (t,  $J = 7.3\text{ Hz}$ , 1H), 7.31 (t,  $J = 7.5\text{ Hz}$ , 2H), 7.18 (d,  $J = 8.0\text{ Hz}$ , 2H), 7.14 (d,  $J = 8.2\text{ Hz}$ , 2H), 6.78 (s, 1H), 4.46 (d,  $J = 4.9\text{ Hz}$ , 2H).

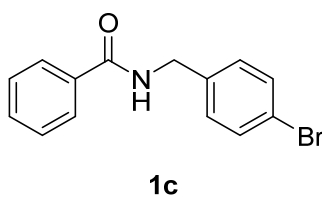

---

***N*-(4-bromobenzyl)benzamide (1c)<sup>4</sup>** : According to the procedure **A**, the title compound **1c** was obtained as white solid (0.65 g, isolated yield: 56%).  $R_f = 0.30$  (silica gel, petroleum ether/EtOAc = 3:1). Melting Point: 141-143 °C (reported melting point: 141-142 °C).

<sup>1</sup>H NMR (600 MHz, CDCl<sub>3</sub>)  $\delta$  7.77 (d,  $J = 7.6$  Hz, 2H), 7.49 (t,  $J = 7.3$  Hz, 1H), 7.45 – 7.35 (m, 4H), 7.17 (d,  $J = 8.0$  Hz, 2H), 6.86 (s, 1H), 4.53 (d,  $J = 5.7$  Hz, 2H).

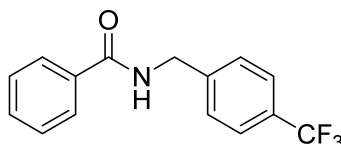

**1d**

***N*-(4-(trifluoromethyl)benzyl)benzamide (1d)<sup>5</sup>** : According to the procedure **A**, the title compound **1d** was obtained as white solid (0.55 g, isolated yield: 48%).  $R_f = 0.30$  (silica gel, petroleum ether/EtOAc = 3:1). Melting Point: 132-133 °C (reported melting point: 132-134 °C).

<sup>1</sup>H NMR (600 MHz, CDCl<sub>3</sub>)  $\delta$  7.79 (d,  $J = 7.3$  Hz, 2H), 7.56 (d,  $J = 8.1$  Hz, 2H), 7.51 (t,  $J = 7.4$  Hz, 1H), 7.41 (t,  $J = 7.8$  Hz, 4H), 6.86 (s, 1H), 4.65 (d,  $J = 5.9$  Hz, 2H).

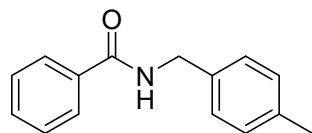

**1e**

***N*-(4-methylbenzyl)benzamide (1e)<sup>4</sup>** : According to the procedure **A**, the title compound **1e** was obtained as white solid (0.65 g, isolated yield: 72%).  $R_f = 0.55$  (silica gel, petroleum ether/EtOAc = 3:1). Melting Point: 137-139 °C (reported melting point: 137-138 °C).

<sup>1</sup>H NMR (600 MHz, CDCl<sub>3</sub>)  $\delta$  7.78 (d,  $J = 7.7$  Hz, 2H), 7.49 (t,  $J = 7.2$  Hz, 1H), 7.41 (t,  $J = 7.6$  Hz, 2H), 7.25 (d,  $J = 7.7$  Hz, 2H), 7.16 (d,  $J = 7.7$  Hz, 2H), 6.46 (s, 1H), 4.59 (d,  $J = 5.4$  Hz, 2H), 2.35 (s, 3H).

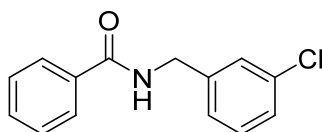

**1f**

---

***N*-(3-chlorobenzyl)benzamide (1f)**<sup>6</sup> : According to the procedure **A**, the title compound **1f** was obtained as white solid (1.17 g, isolated yield: 48%).  $R_f = 0.45$  (silica gel, petroleum ether/EtOAc = 3:1). Melting Point: 140-141 °C (reported melting point: 139-140 °C).

<sup>1</sup>H NMR (600 MHz, CDCl<sub>3</sub>)  $\delta$  7.85 (d,  $J = 7.3$  Hz, 2H), 7.54 (t,  $J = 7.4$  Hz, 1H), 7.44 (t,  $J = 7.7$  Hz, 2H), 7.34 (s, 1H), 7.28 (d,  $J = 4.6$  Hz, 2H), 7.23 (d,  $J = 4.1$  Hz, 1H), 7.17 (s, 1H), 4.59 (d,  $J = 5.9$  Hz, 2H).

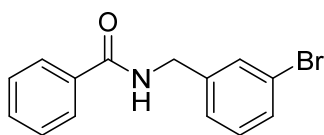

**1g**

***N*-(3-bromobenzyl)benzamide (1g)**<sup>7</sup> : According to the procedure **A**, the title compound **1g** was obtained as white solid (0.71 g, isolated yield: 65%).  $R_f = 0.45$  (silica gel, petroleum ether/EtOAc = 3:1). Melting Point: 117-119 °C (reported melting point: 117-118 °C).

<sup>1</sup>H NMR (600 MHz, CDCl<sub>3</sub>)  $\delta$  7.79 (d,  $J = 7.9$  Hz, 2H), 7.49 (t,  $J = 7.3$  Hz, 1H), 7.46 (s, 1H), 7.40 (t,  $J = 8.5$  Hz, 3H), 7.24 (d,  $J = 7.5$  Hz, 1H), 7.18 (t,  $J = 7.8$  Hz, 1H), 6.83 (s, 1H), 4.56 (d,  $J = 5.7$  Hz, 2H)

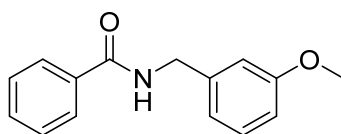

**1h**

***N*-(3-methoxybenzyl)benzamide (1h)**<sup>7</sup> : According to the procedure **A**, the title compound **1h** was obtained as white solid (1.95 g, isolated yield: 81%).  $R_f = 0.50$  (silica gel, petroleum ether/EtOAc = 3:1). Melting Point: 137-139 °C (reported melting point: 137-138 °C).

<sup>1</sup>H NMR (600 MHz, CDCl<sub>3</sub>)  $\delta$  7.71 (d,  $J = 7.4$  Hz, 2H), 7.41 (t,  $J = 7.4$  Hz, 1H), 7.34 (t,  $J = 7.6$  Hz, 2H), 7.18 (t,  $J = 7.9$  Hz, 1H), 6.85 (d,  $J = 7.5$  Hz, 1H), 6.81 (s, 1H), 6.75 (d,  $J = 8.2$  Hz, 1H), 6.49 (s, 1H), 4.52 (d,  $J = 5.6$  Hz, 2H), 3.71 (s, 3H).

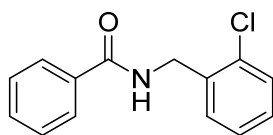

**1i**

***N*-(2-chlorobenzyl)benzamide (1i)**<sup>6</sup> : According to the procedure **A**, the title compound **1i** was obtained as white solid (2.01 g, isolated yield: 82%).  $R_f$  = 0.40 (silica gel, petroleum ether/EtOAc = 3:1). Melting Point: 140-141 °C (reported melting point: 140-142 °C).

<sup>1</sup>H NMR (600 MHz, CDCl<sub>3</sub>)  $\delta$  7.78 (d,  $J$  = 7.2 Hz, 2H), 7.48 (t,  $J$  = 7.4 Hz, 1H), 7.43 – 7.34 (m, 4H), 7.24 – 7.19 (m, 2H), 6.89 (s, 1H), 4.69 (d,  $J$  = 6.0 Hz, 2H).

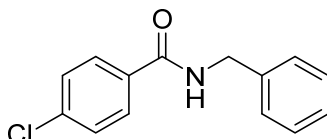

**1j**

***N*-benzyl-4-chlorobenzamide (1j)**<sup>13</sup> : **1j** was obtained from Cai's group.

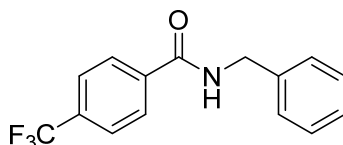

**1k**

***N*-benzyl-4-(trifluoromethyl)benzamide (1k)**<sup>7</sup> : According to the procedure **A**, the title compound **1k** was obtained as white solid (1.49 g, isolated yield: 89%).  $R_f$  = 0.25 (silica gel, petroleum ether/EtOAc = 3:1). Melting Point: 169-172 °C (reported melting point: 167-168 °C).

<sup>1</sup>H NMR (600 MHz, CDCl<sub>3</sub>)  $\delta$  7.87 (d,  $J$  = 7.1 Hz, 2H), 7.65 (d,  $J$  = 6.7 Hz, 2H), 7.33 (s, 5H), 6.76 (s, 1H), 4.62 (s, 2H).

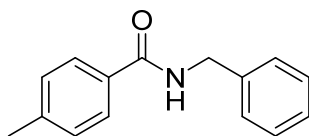

**1l**

***N*-benzyl-4-methylbenzamide (1l)**<sup>6</sup> : According to the procedure **A**, the title compound **1l** was obtained as white solid (0.90 g, isolated yield: 80%).  $R_f$  = 0.45 (silica

gel, petroleum ether/EtOAc = 3:1). Melting Point: 133-134 °C (reported melting point: 134-135 °C).

<sup>1</sup>H NMR (600 MHz, CDCl<sub>3</sub>) δ 7.68 (d, *J* = 8.1 Hz, 2H), 7.32 (d, *J* = 4.4 Hz, 4H), 7.27 (dq, *J* = 8.7, 4.0 Hz, 1H), 7.19 (d, *J* = 8.0 Hz, 2H), 6.62 (s, 1H), 4.60 (d, *J* = 5.7 Hz, 2H), 2.37 (s, 3H).

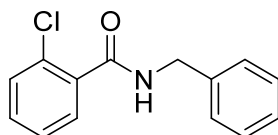

**1m**

*N*-benzyl-2-chlorobenzamide (**1m**)<sup>8</sup> : According to the procedure **A**, the title compound **1m** was obtained as white solid (1.71 g, isolated yield: 86%). *R*<sub>f</sub> = 0.45 (silica gel, petroleum ether/EtOAc = 3:1). Melting Point: 104-105 °C (reported melting point: 104-105 °C).

<sup>1</sup>H NMR (600 MHz, CDCl<sub>3</sub>) δ 7.59 (dd, *J* = 7.6, 1.4 Hz, 1H), 7.37 – 7.32 (m, 5H), 7.31 (dd, *J* = 7.8, 1.6 Hz, 1H), 7.29 – 7.25 (m, 2H), 6.66 (s, 1H), 4.60 (d, *J* = 5.7 Hz, 2H).

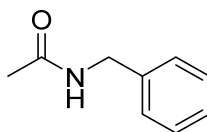

**1n**

*N*-benzylacetamide (**1n**)<sup>4</sup> : According to the procedure **B**, the title compound **1n** was obtained as white solid (0.67 g, isolated yield: 91%). *R*<sub>f</sub> = 0.25 (silica gel, petroleum ether/EtOAc = 5:1). Melting Point: 60-61 °C (reported melting point: 67-68 °C).

<sup>1</sup>H NMR (600 MHz, CDCl<sub>3</sub>) δ 7.31 (t, *J* = 7.3 Hz, 2H), 7.26 (t, *J* = 6.8 Hz, 3H), 6.21 (s, 1H), 4.38 (d, *J* = 5.7 Hz, 2H), 1.98 (s, 3H).

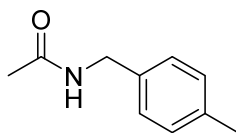

**1o**

*N*-(4-methylbenzyl)acetamide (**1o**)<sup>9</sup> : According to the procedure **B**, the title compound **1o** was obtained as white solid (0.47 g, isolated yield: 58%). *R*<sub>f</sub> = 0.25 (silica



---

gel, petroleum ether/EtOAc = 5:1). Melting Point: 110-111 °C (reported melting point: 110-113 °C).

<sup>1</sup>H NMR (600 MHz, CDCl<sub>3</sub>) δ 7.12 (q, *J* = 8.0 Hz, 4H), 6.30 (s, 1H), 4.31 (d, *J* = 5.6 Hz, 2H), 2.31 (s, 3H), 1.95 (s, 3H).

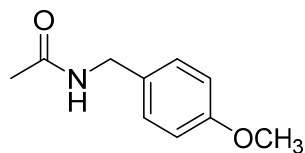

**1p**

*N*-(4-methoxybenzyl)acetamide (**1p**)<sup>9</sup> : According to the procedure **B**, the title compound **1p** was obtained as white solid (0.50 g, isolated yield: 28%). *R*<sub>f</sub> = 0.60 (silica gel, petroleum ether/EtOAc = 5:1). Melting Point: 96-97 °C (reported melting point: 96-97 °C).

<sup>1</sup>H NMR (600 MHz, CDCl<sub>3</sub>) δ 7.15 (d, *J* = 8.3 Hz, 2H), 6.81 (d, *J* = 8.4 Hz, 2H), 6.36 (s, 1H), 4.27 (d, *J* = 5.2 Hz, 2H), 3.74 (s, 3H), 1.93 (s, 3H).

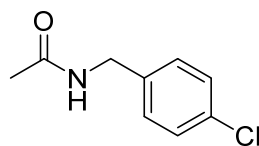

**1q**

*N*-(4-chlorobenzyl)acetamide (**1q**)<sup>9</sup> : According to the procedure **B**, the title compound **1q** was obtained as white solid (1.04 g, isolated yield: 71%). *R*<sub>f</sub> = 0.10 (silica gel, petroleum ether/EtOAc = 5:1). Melting Point: 106-108 °C (reported melting point: 107-108 °C).

<sup>1</sup>H NMR (600 MHz, CDCl<sub>3</sub>) δ 7.24 (d, *J* = 8.3 Hz, 2H), 7.14 (d, *J* = 8.3 Hz, 2H), 6.50 (s, 1H), 4.30 (d, *J* = 5.8 Hz, 2H), 1.95 (s, 3H).

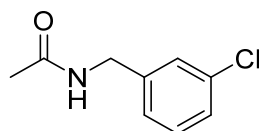

**1r**

*N*-(3-chlorobenzyl)acetamide (**1r**)<sup>9</sup> : According to the procedure **B**, the title compound **1r** was obtained as white solid (1.27 g, isolated yield: 69%). *R*<sub>f</sub> = 0.10 (silica gel,

petroleum ether/EtOAc = 5:1). Melting Point: 128-129 °C (reported melting point: 127-128 °C).

<sup>1</sup>H NMR (600 MHz, CDCl<sub>3</sub>) δ 7.21 (d, *J* = 5.9 Hz, 3H), 7.10 (d, *J* = 5.7 Hz, 1H), 6.52 (s, 1H), 4.32 (d, *J* = 5.9 Hz, 2H), 1.97 (s, 3H).

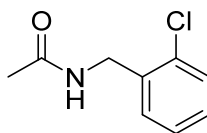

**1s**

***N*-(2-chlorobenzyl)acetamide (1s)<sup>9</sup>**: According to the procedure **B**, the title compound **1s** was obtained as white solid (0.54 g, isolated yield: 37%). *R*<sub>f</sub> = 0.10 (silica gel, petroleum ether/EtOAc = 5:1). Melting Point: 72-73 °C (reported melting point: 72-73 °C).

<sup>1</sup>H NMR (600 MHz, CDCl<sub>3</sub>) δ 7.34 (q, *J* = 4.7 Hz, 2H), 7.23 – 7.18 (m, 2H), 6.21 (s, 1H), 4.48 (d, *J* = 6.0 Hz, 2H), 1.98 (s, 3H).

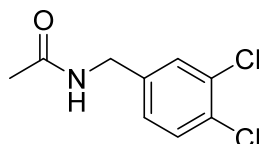

**1t**

***N*-(3,4-dichlorobenzyl)acetamide (1t)<sup>10</sup>**: According to the procedure **B**, the title compound **1t** was obtained as white solid (1.21 g, isolated yield: 70%). *R*<sub>f</sub> = 0.10 (silica gel, petroleum ether/EtOAc = 5:1). Melting Point: 95-96 °C (reported melting point: 97-98 °C).

<sup>1</sup>H NMR (600 MHz, CDCl<sub>3</sub>) δ 7.36 – 7.28 (m, 2H), 7.07 – 7.03 (m, 1H), 6.61 (s, 1H), 4.29 (d, *J* = 6.0 Hz, 2H), 1.97 (s, 3H).

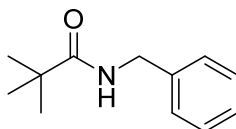

**1u**

***N*-benzylpivalamide (1u)<sup>8</sup>**: According to the procedure **B**, the title compound **1u** was obtained as white solid (0.96 g, isolated yield: 50%). *R*<sub>f</sub> = 0.55 (silica gel,

---

petroleum ether/EtOAc = 5:1). Melting Point: 81-82 °C (reported melting point: 81-83 °C).

<sup>1</sup>H NMR (600 MHz, CDCl<sub>3</sub>) δ 7.25 (t, *J* = 7.3 Hz, 2H), 7.18 (t, *J* = 5.7 Hz, 3H), 5.93 (s, 1H), 4.35 (d, *J* = 5.1 Hz, 2H), 1.15 (s, 9H).

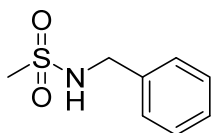

**1v**

***N*-benzylmethanesulfonamide (1v)**<sup>11</sup> : According to the procedure **B**, the title compound **1v** was obtained as white solid (0.64 g, isolated yield: 43%). *R*<sub>f</sub> = 0.45 (silica gel, petroleum ether/EtOAc = 3:1). Melting Point: 62-63 °C (reported melting point: 62-63°C).

<sup>1</sup>H NMR (600 MHz, CDCl<sub>3</sub>) δ 7.35 (d, *J* = 6.5 Hz, 4H), 7.31 (d, *J* = 6.5 Hz, 1H), 5.08 (s, 1H), 4.29 (s, 2H), 2.82 (s, 3H).

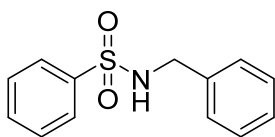

**1w**

***N*-benzylbenzenesulfonamide (1w)**<sup>4</sup> : According to the procedure **B**, the title compound **1w** was obtained as white solid (1.81 g, isolated yield: 92%). *R*<sub>f</sub> = 0.45 (silica gel, petroleum ether/EtOAc = 3:1). Melting Point: 85-86 °C (reported melting point: 85-87 °C).

<sup>1</sup>H NMR (600 MHz, CDCl<sub>3</sub>) δ 7.83 (d, *J* = 7.6 Hz, 2H), 7.54 (t, *J* = 7.4 Hz, 1H), 7.45 (t, *J* = 7.8 Hz, 2H), 7.21 (q, *J* = 6.3 Hz, 3H), 7.17 – 7.13 (m, 2H), 5.29 (t, *J* = 6.3 Hz, 1H), 4.09 (d, *J* = 6.3 Hz, 2H).

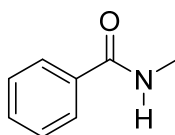

**1x**

***N*-methylbenzamide (1x) [613-93-4]**: **1x** was purchased from Bide Pharmaceutical.

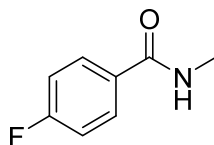

**1y**

**4-fluoro-*N*-methylbenzamide (1y)** [701-49-5]: **1y** was purchased from Bide Pharmaceutical.

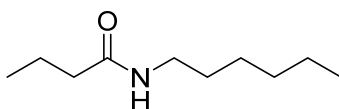

**1z**

***N*-butyrylhexanamide (1z)**<sup>13</sup>: **1z** was obtained from Cai's group.

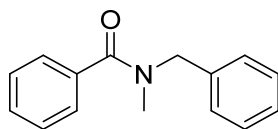

**1aa**

***N*-hexylbutyramide (1aa)**<sup>12</sup>: According to the procedure **A**, the title compound **1aa** was obtained as colorless oil (0.72 g, isolated yield: 35%).  $R_f = 0.40$  (silica gel, petroleum ether/EtOAc = 3:1).

<sup>1</sup>H NMR (600 MHz, CDCl<sub>3</sub>)  $\delta$  7.51 – 7.11 (m, 10H), 4.63 (d,  $J = 152.1$  Hz, 2H), 2.94 (d,  $J = 104.0$  Hz, 3H).

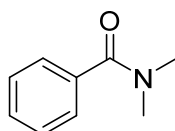

**1ab**

***N,N*-dimethylbenzamide (1ab)** [611-74-5]: **1ab** was purchased from Bide Pharmaceutical.

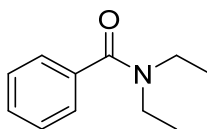

**1ac**

***N,N*-diethylbenzamide (1ac)**<sup>13</sup>: **1ac** was obtained from Cai's group.

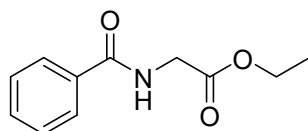

**1ad**

**ethyl benzoylglycinate (1ad)** [1499-53-2]: **1ad** was purchased from Bide Pharmaceutical.

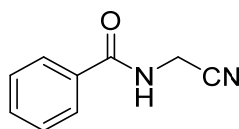

**1ae**

*N*-(cyanomethyl)benzamide (**1ae**)<sup>3</sup> : According to the procedure **C**, the title compound **1ae** was obtained as colorless solid (0.56 g, isolated yield: 70%).  $R_f = 0.10$  (silica gel, petroleum ether/EtOAc = 3:1). Melting Point: 81-82 °C (reported melting point: 81-83 °C).

<sup>1</sup>H NMR (600 MHz, CDCl<sub>3</sub>)  $\delta$  7.79 (d,  $J = 7.4$  Hz, 2H), 7.56 (t,  $J = 7.4$  Hz, 1H), 7.47 (t,  $J = 7.6$  Hz, 2H), 6.59 (s, 1H), 4.40 (d,  $J = 5.8$  Hz, 2H).

### 3. Optimization of Reaction Conditions

#### 3.1 Screening of catalyst

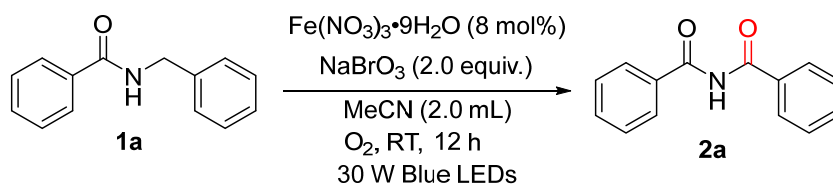

| Entry | Variation from the standard conditions <sup>a</sup>                                                                 | Yield (%) <sup>b</sup> |
|-------|---------------------------------------------------------------------------------------------------------------------|------------------------|
| 1     | None                                                                                                                | 94                     |
| 2     | $\text{Fe}(\text{acac})_3$ instead of $\text{Fe}(\text{NO}_3)_3 \cdot 9\text{H}_2\text{O}$                          | trace                  |
| 3     | $\text{Fe}(\text{OTf})_3$ instead of $\text{Fe}(\text{NO}_3)_3 \cdot 9\text{H}_2\text{O}$                           | 54                     |
| 4     | $\text{Fe}_2(\text{SO}_4)_3$ instead of $\text{Fe}(\text{NO}_3)_3 \cdot 9\text{H}_2\text{O}$                        | 56                     |
| 5     | $\text{FeBr}_3$ instead of $\text{Fe}(\text{NO}_3)_3 \cdot 9\text{H}_2\text{O}$                                     | 58                     |
| 6     | $\text{CuBr}_2$ instead of $\text{Fe}(\text{NO}_3)_3 \cdot 9\text{H}_2\text{O}$                                     | 30                     |
| 7     | $\text{Cu}(\text{NO}_3)_2 \cdot \text{H}_2\text{O}$ instead of $\text{Fe}(\text{NO}_3)_3 \cdot 9\text{H}_2\text{O}$ | 71                     |

<sup>a</sup>Reaction conditions: **1a** (0.2 mmol),  $\text{Fe}(\text{NO}_3)_3 \cdot 9\text{H}_2\text{O}$  (0.016 mmol, 8 mol%),  $\text{NaBrO}_3$  (0.4 mmol, 2.0 equiv.) in  $\text{CH}_3\text{CN}$  (2.0 mL) in the presence of  $\text{O}_2$  at room temperature with 30 W blue LEDs ( $\lambda = 455 \text{ nm}$ , at a distance of 4-5 cm) irradiation for 12 h. <sup>b</sup>Isolated yield.

### 3.2 Screening of solvents

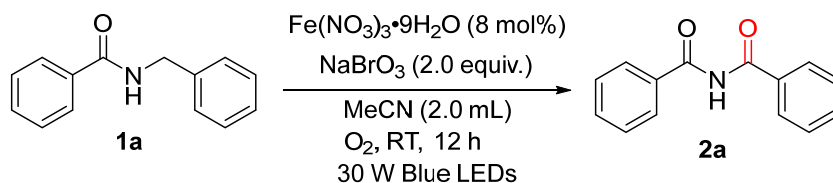

| Entry | Variation from the standard conditions <sup>a</sup> | Yield (%) <sup>b</sup> |
|-------|-----------------------------------------------------|------------------------|
| 1     | None                                                | 94                     |
| 2     | $\text{H}_2\text{O}:\text{MeCN} = 1:1$              | 91                     |
| 3     | DCM instead of MeCN                                 | 16                     |
| 4     | MeOH instead of MeCN                                | n.p. <sup>c</sup>      |
| 5     | Acetone instead of MeCN                             | 29                     |
| 6     | $\text{CCl}_4$ instead of MeCN                      | 28                     |

<sup>a</sup>Reaction conditions: **1a** (0.2 mmol),  $\text{Fe}(\text{NO}_3)_3 \cdot 9\text{H}_2\text{O}$  (0.016 mmol, 8 mol%),  $\text{NaBrO}_3$  (0.4 mmol, 2.0 equiv.) in  $\text{CH}_3\text{CN}$  (2.0 mL) in the presence of  $\text{O}_2$  at room temperature with 30 W blue LEDs ( $\lambda = 455$  nm, at a distance of 4-5 cm) irradiation for 12 h. <sup>b</sup>Isolated yield. <sup>c</sup>n.p. = no product.

### 3.3 Screening of oxidant

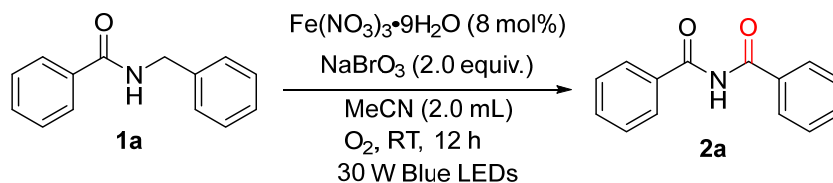

| Entry | Variation from the standard conditions <sup>a</sup> | Yield (%) <sup>b</sup> |
|-------|-----------------------------------------------------|------------------------|
| 1     | None                                                | 94                     |
| 2     | 1 eq. $\text{NaBrO}_3$                              | 88                     |
| 3     | Air instead of $\text{O}_2$                         | 55                     |

<sup>a</sup>Reaction conditions: **1a** (0.2 mmol),  $\text{Fe}(\text{NO}_3)_3 \cdot 9\text{H}_2\text{O}$  (0.016 mmol, 8 mol%),  $\text{NaBrO}_3$  (0.4 mmol, 2.0 equiv.) in  $\text{CH}_3\text{CN}$  (2.0 mL) in the presence of  $\text{O}_2$  at room temperature with 30 W blue LEDs ( $\lambda = 455$  nm, at a distance of 4-5 cm) irradiation for 12 h. <sup>b</sup>Isolated yield.

---

## 4. Experimental Procedures

### 4.1 The photos of the photochemical reactor

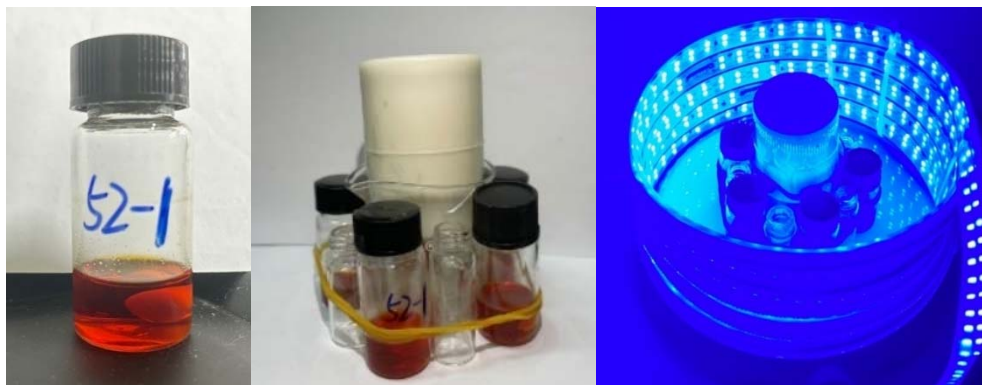

**Figure S1.** Reaction setup for standard conditions (0.2 mmol scale)



## 4.2 Report of spectroradiometric analysis for light source

| Basic Information        |                                                                                                                                   |                     |                                                                                                                 |
|--------------------------|-----------------------------------------------------------------------------------------------------------------------------------|---------------------|-----------------------------------------------------------------------------------------------------------------|
| Sample                   | 30W Blue Light source                                                                                                             |                     |                                                                                                                 |
| Sample Information       | Blue light source                                                                                                                 | Testing Date        | 2023.07.22                                                                                                      |
| Tester                   | Shu-Hong Liu                                                                                                                      | Ambient Temperature | 25°C                                                                                                            |
| Testing Result           |                                                                                                                                   |                     |                                                                                                                 |
| Setup photo              | 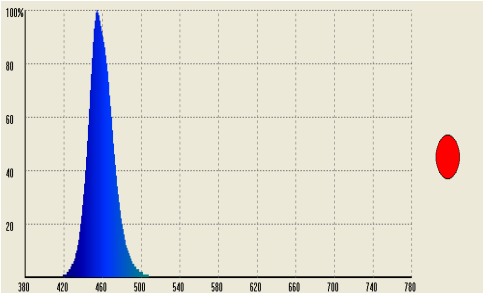 <p>Spectrum distribution</p>                   |                     |  <p>Chromaticity diagram</p> |
| Chromaticity Coordinates | x=0.1440 y=0.0381 u=0.1818 v=0.1082                                                                                               |                     |                                                                                                                 |
| Temperature              | >25000K                                                                                                                           | Peak Wavelength     | 455nm                                                                                                           |
| SDCM                     | 0                                                                                                                                 | Main Wavelength     | 461nm                                                                                                           |
| Color Shift              | 0.000000 duv                                                                                                                      | Wavelength Width    | 0nm                                                                                                             |
| Red Ratio                | 0                                                                                                                                 | Color Purty         | 98.00%                                                                                                          |
| Luminous Flux            | 1.661e3lux                                                                                                                        | Radiant Flux        | 3.489e4w/m2                                                                                                     |
| Rendering Flux           | Ra=53.0 R1=23.0 R2=56.0 R3=99.0 R4=86.0 R5=6.0 R6=67.0<br>R7=52.0 R8=38.0 R9=99.0 R10=99.0 R11=99.0 R12=99.0 R13=45.0<br>R14=34.0 |                     |                                                                                                                 |

### 4.3 General procedure for $\alpha$ -oxidation of amide

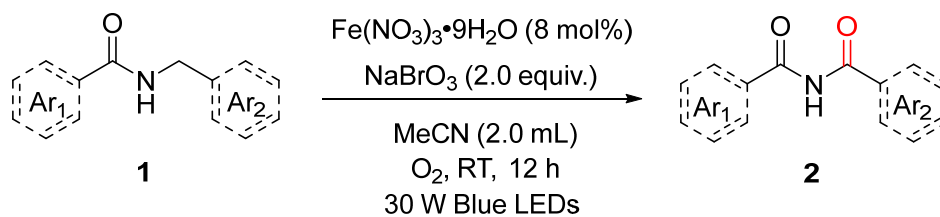

Amide (0.2 mmol, 1.0 equiv.),  $\text{Fe}(\text{NO}_3)_3 \cdot 9\text{H}_2\text{O}$  (0.016 mmol, 8 mol%, 6.2 mg),  $\text{NaBrO}_3$  (0.4 mmol, 2.0 equiv. 60.3 mg) and  $\text{CH}_3\text{CN}$  (2.0 mL) were placed in a dry 10 mL reaction flask in an air atmosphere. The reaction mixture was irradiated with 30W blue LEDs ( $\lambda = 455 \text{ nm}$ , at a distance of 4-5 cm, 1000 rpm stir rate) at room temperature in the presence of  $\text{O}_2$  for 12 h. After completion of the reaction, the organic solvent was removed under vacuum, the mixture was purified directly by silica gel column chromatography (petroleum ether/EtOAc) to give the desired products **2a-2aa**.

## 5. Mechanistic Studies

### 5.1 Other functional groups exploration

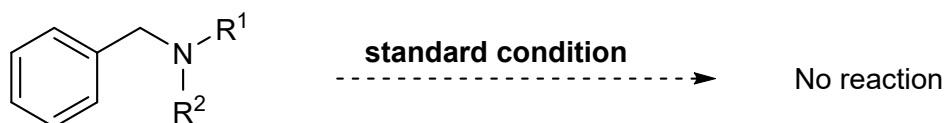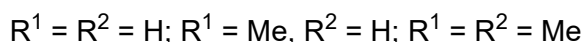

Other substrates including benzylamine, *N*-methylbenzylamine and *N,N*-dimethylbenzylamine were tested (0.2 mmol, 1.0 equiv.),  $Fe(NO_3)_3 \cdot 9H_2O$  (0.016 mmol, 8 mol%, 6.2 mg),  $NaBrO_3$  (0.4 mmol, 2.0 equiv. 60.3 mg) and  $CH_3CN$  (2.0 mL) were placed in a dry 10 mL reaction flask in an air atmosphere. The reaction mixture was irradiated with 30W blue LEDs ( $\lambda = 455$  nm, at a distance of 4-5 cm, 1000 rpm stir rate) at room temperature in the presence of  $O_2$  for 12 h. After completion of the reaction, the organic solvent would be monitored by TLC and all the substrates were not tolerated.

### 5.2 Radical inhibition and trapping experiments

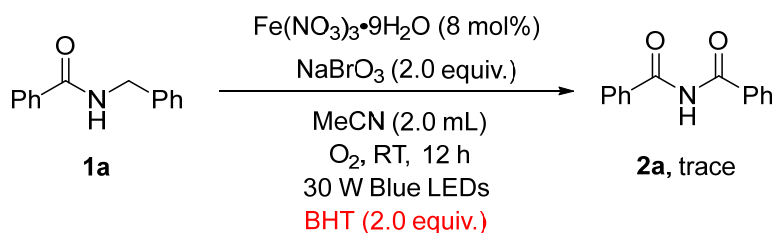

*N*-benzoylbenzamide (0.2 mmol, 1.0 equiv. 42.2 mg),  $Fe(NO_3)_3 \cdot 9H_2O$  (0.016 mmol, 8 mol%, 6.2 mg),  $NaBrO_3$  (0.4 mmol, 2.0 equiv. 60.3 mg), (2,6-di-*tert*-butyl-4-methylphenol) BHT (0.4 mmol, 2.0 equiv. 44.0 mg) and  $CH_3CN$  (2.0 mL) were placed in a dry 10 mL reaction flask in an air atmosphere. The reaction mixture was irradiated with 30W blue LEDs ( $\lambda = 455$  nm, at a distance of 4-5 cm, 1000 rpm stir rate) at room temperature in the presence of  $O_2$  for 12 h. After completion of the reaction, the organic solvent would be monitored by TLC and the product **2a** was only given trace amount.

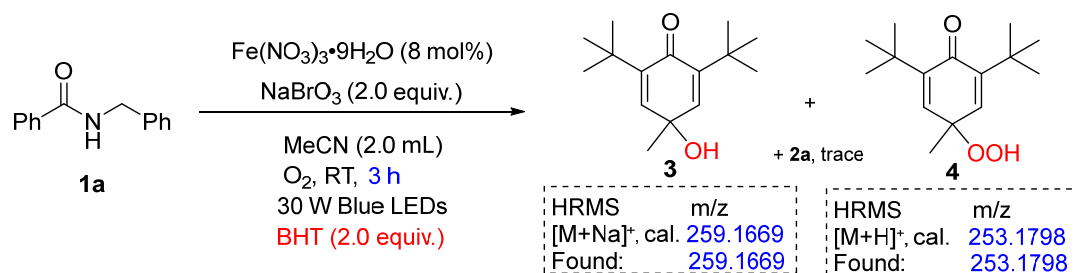

*N*-benzoylbenzamide (0.2 mmol, 1.0 equiv. 42.2mg),  $\text{Fe}(\text{NO}_3)_3 \cdot 9\text{H}_2\text{O}$  (0.016 mmol, 8 mol%, 6.2 mg),  $\text{NaBrO}_3$  (0.4 mmol, 2.0 equiv. 60.3mg), 2,6-di-tert-butyl-4-methylphenol (BHT) (0.4 mmol, 2.0 equiv. 44.0 mg) and  $\text{CH}_3\text{CN}$  (2.0 mL) were placed in a dry 10 mL reaction flask in an air atmosphere. The reaction mixture was irradiated with 30W blue LEDs ( $\lambda = 455$  nm, at a distance of 4-5 cm, 1000 rpm stir rate) at room temperature in the presence of  $\text{O}_2$  for 3 h. After completion of the reaction, the organic solvent would be monitored by Mass spectrometry (HRMS) and the hydroxyl radical ( $\text{HO}\cdot$ ) intermediate **3** and the hydroperoxyl radical ( $\text{HOO}\cdot$ ) intermediate **4** were verified.

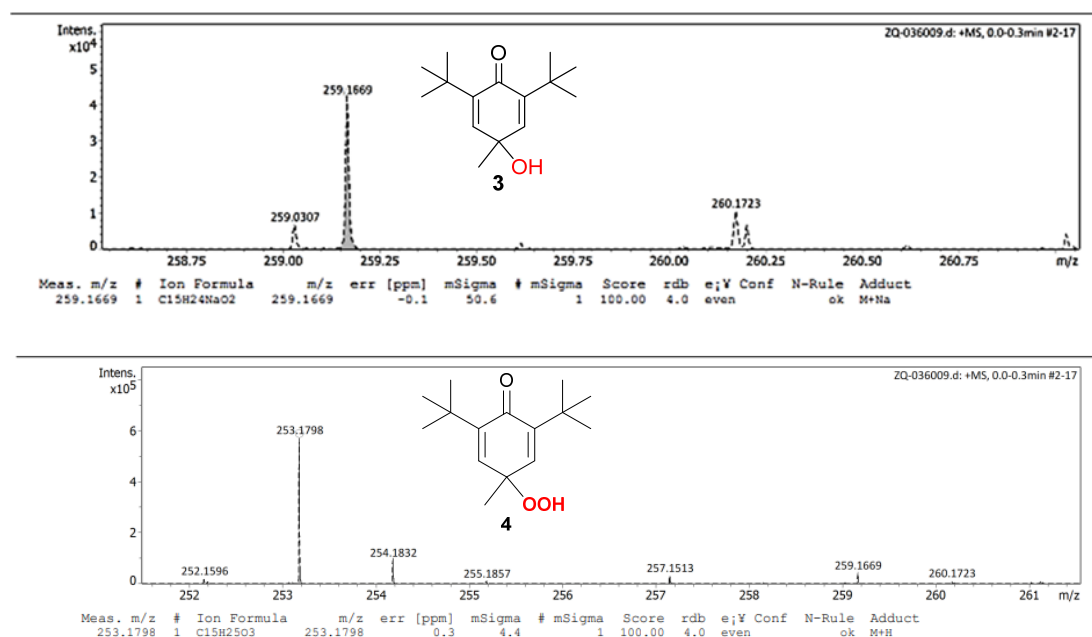

**Figure S2.** Mass spectrometry (HRMS) data of the radical trapping experiment (with BHT).

### 5.3 Electron paramagnetic resonance (EPR) experiments

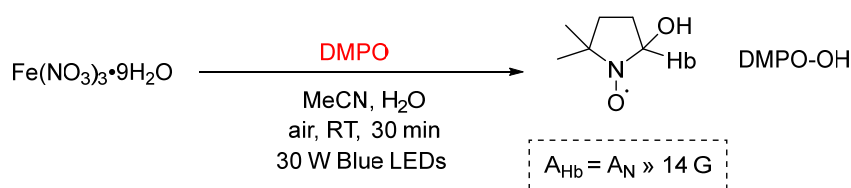

$\text{Fe}(\text{NO}_3)_3 \cdot 9\text{H}_2\text{O}$  (0.04 mmol, 16.2 mg),  $\text{H}_2\text{O}$  (1.0 mL) and  $\text{CH}_3\text{CN}$  (1.0 mL) were placed in a 10 mL reaction flask and the mixture solution was stirred well. 1 mL of the mixture solution was transferred into another 10 mL dry reaction flask and DMPO (5,5-Dimethyl-1-pyrroline-*N*-oxide, 10  $\mu\text{L}$ ) was added as radical capturer. The mixture was irradiated with blue LEDs at room temperature for 30 min. Then the organic solvent would be monitored by electron paramagnetic resonance (EPR) instrument and the result showed that the hydroxyl radical was captured.

#### 5.4 UV-vis absorption experiments

According to the test condition 1 ( $\text{Fe cat.} + \mathbf{1a} + \text{NaBrO}_3 + \text{MeCN} + \text{O}_2 + \text{irr. 30 min.}$ ),  $\text{Fe}(\text{NO}_3)_3 \cdot 9\text{H}_2\text{O}$  (0.2 mmol, 80.2 mg), *N*-benzoylbenzamide **1a** (0.2 mmol, 42.2 mg),  $\text{NaBrO}_3$  (0.2 mmol, 30.1 mg) and  $\text{CH}_3\text{CN}$  (2.0 mL) were placed in a dry 10 mL reaction flask and the reaction mixture ( $c = 0.1 \text{ mol/L}$ ) was irradiated with 30W blue LEDs ( $\lambda = 455 \text{ nm}$ , at a distance of 4-5 cm, 1000 rpm stir rate) at room temperature in the presence of  $\text{O}_2$  for 30 min. Then 20  $\mu\text{L}$  of the stirred mixture was transferred to the colorimetric cylinder followed the 10 mL isochoric process using additional  $\text{CH}_3\text{CN}$ . The solvent ( $c = 0.02 \text{ mmol/L}$ ) would be monitored by UV-vis absorption spectrophotometer. Other test conditions were operated similarly.

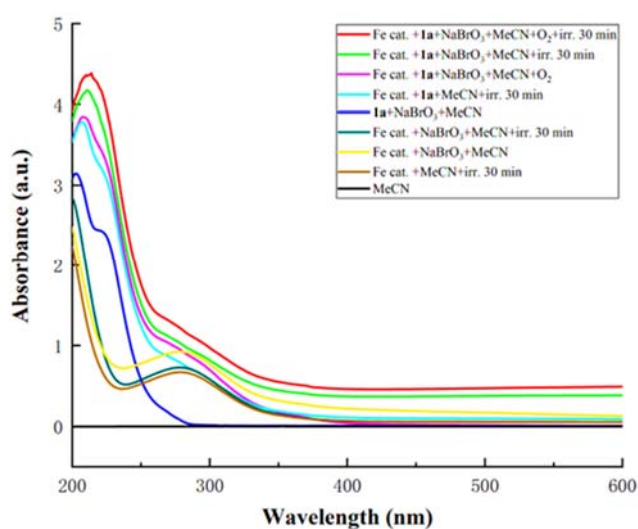

**Figure S3.** UV-vis absorption spectra

---

## 6. References

1. W. J. Yue, C. S. Day and R. Martin, *J. Am. Chem. Soc.*, **2021**, *143*, 6395.
2. Y. Hu, L. Zhou and W. Lu, *Synthesis*, **2017**, *49*, 4007.
3. C. Jöst, C. Nitsche, T. Scholz, L. Roux and C. D. Klein, *J. Med. Chem.*, **2014**, *57*, 7590.
4. B. Sardar, R. Jamatia, A. Samanta and D. Srimani, *J. Org. Chem.*, **2022**, *87*, 5556.
5. J. Wang, J. Ren, Y.-P. Zhu, X.-Q. Sun, P. F. Hu, X. Mu and B. B. Zeng, *Tetrahedron Lett.*, **2023**, *116*, 154312.
6. Y. He, L. Zeng, M. Li, L. Gu, S. Zhang and G. Li, *J. Org. Chem.*, **2022**, *87*, 12622.
7. J. P. Hibbard, J. G. Yam, E. B. Alsalek and A. Bahamonde, *J. Org. Chem.*, **2022**, *87*, 12036.
8. M. Boyle, K. Livingstone, M. C. Henry, J. M. L. Elwood, J. D. Lopez-Fernandez and C. Jamieson, *Org. Lett.*, **2022**, *24*, 334.
9. S. N. Rao, D. C. Mohan and S. Adimurthy, *Org. Lett.*, **2013**, *15*, 1496.
10. S. Ghosh, A. Purkait and C. K. Jana, *Green Chem.*, **2020**, *22*, 8721.
11. Z. Lin, L. Huang and G. Yuan, *Chem. Commun.*, **2021**, *57*, 3579.
12. L. Ren, X. Li and N. Jiao, *Org. Lett.*, **2016**, *18*, 5852.
13. H. H. Chang, X. X. He, Z. L. Zang, C. H. Zhou and G. X. Cai, *Asian J. Org. Chem.*, **2022**, *11*, e202200500.

## 7. Experimental Spectra

### *N*-(4-chlorobenzyl)benzamide (**1b**) $^1\text{H}$ NMR (600 MHz, $\text{CDCl}_3$ ):

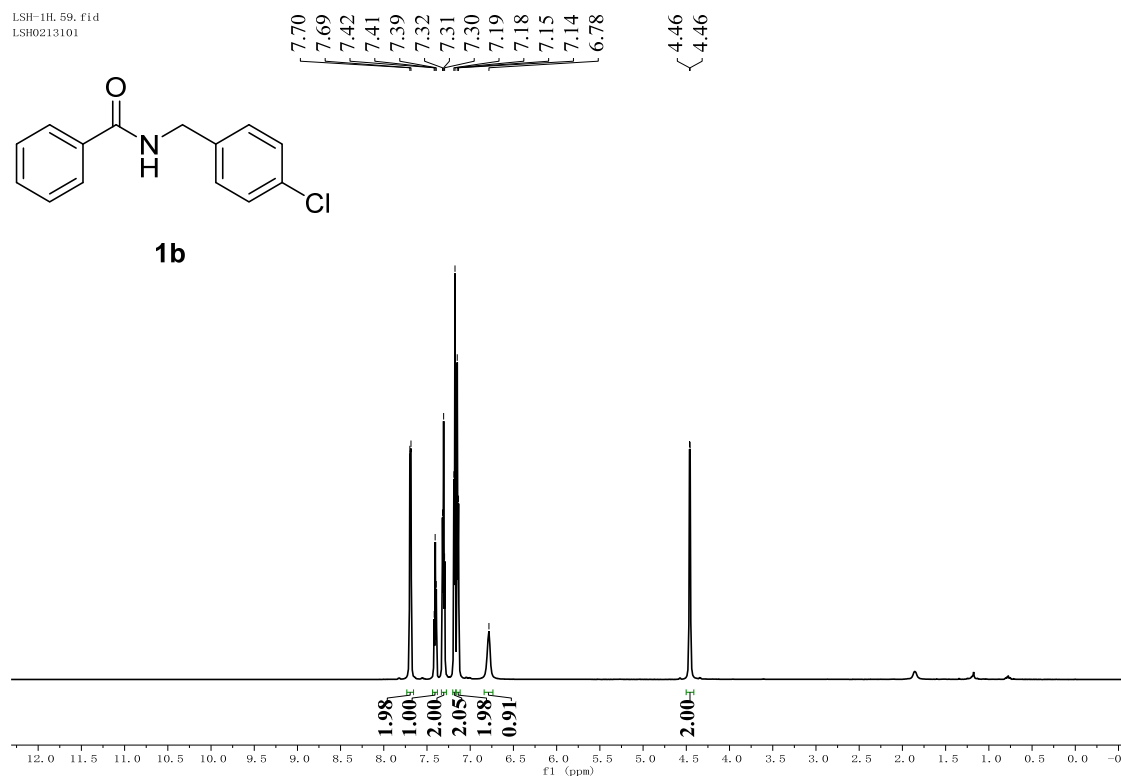

### *N*-(4-bromobenzyl)benzamide (**1c**) $^1\text{H}$ NMR (600 MHz, $\text{CDCl}_3$ ):

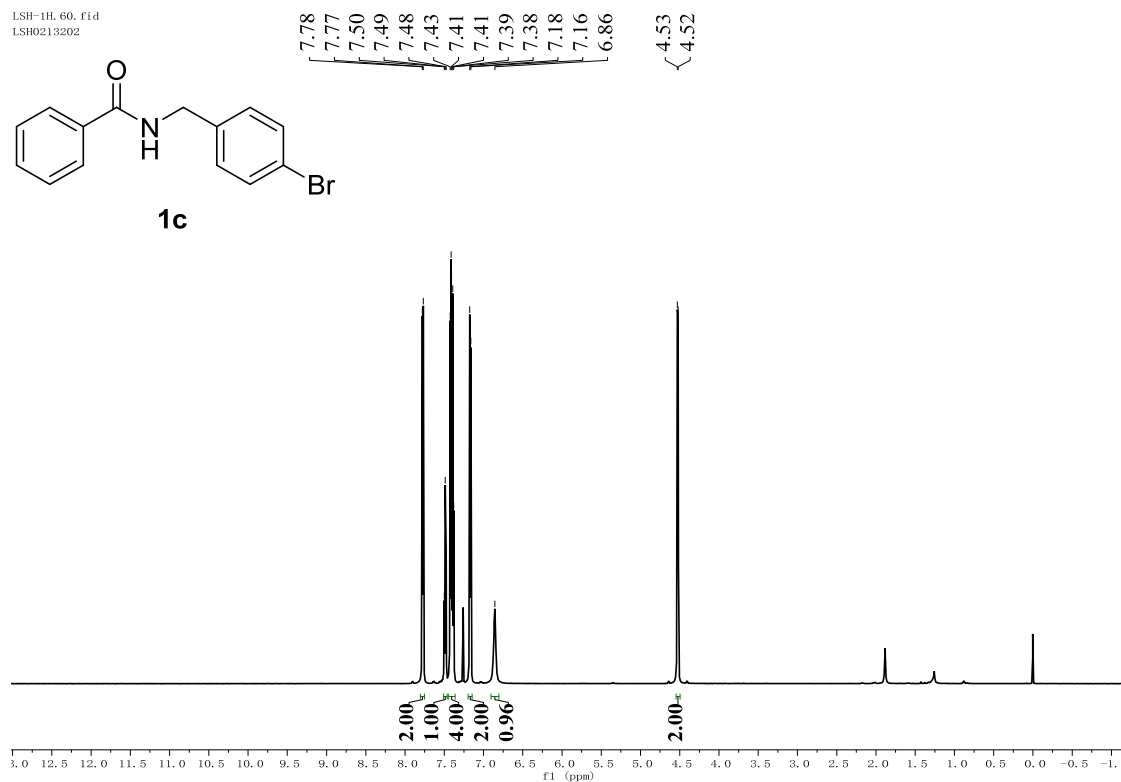

***N*-4-(trifluoromethyl)benzyl)benzamide (1d) <sup>1</sup>H NMR (600 MHz, CDCl<sub>3</sub>):**

LSH-1H.58.f1d  
LSH0213304

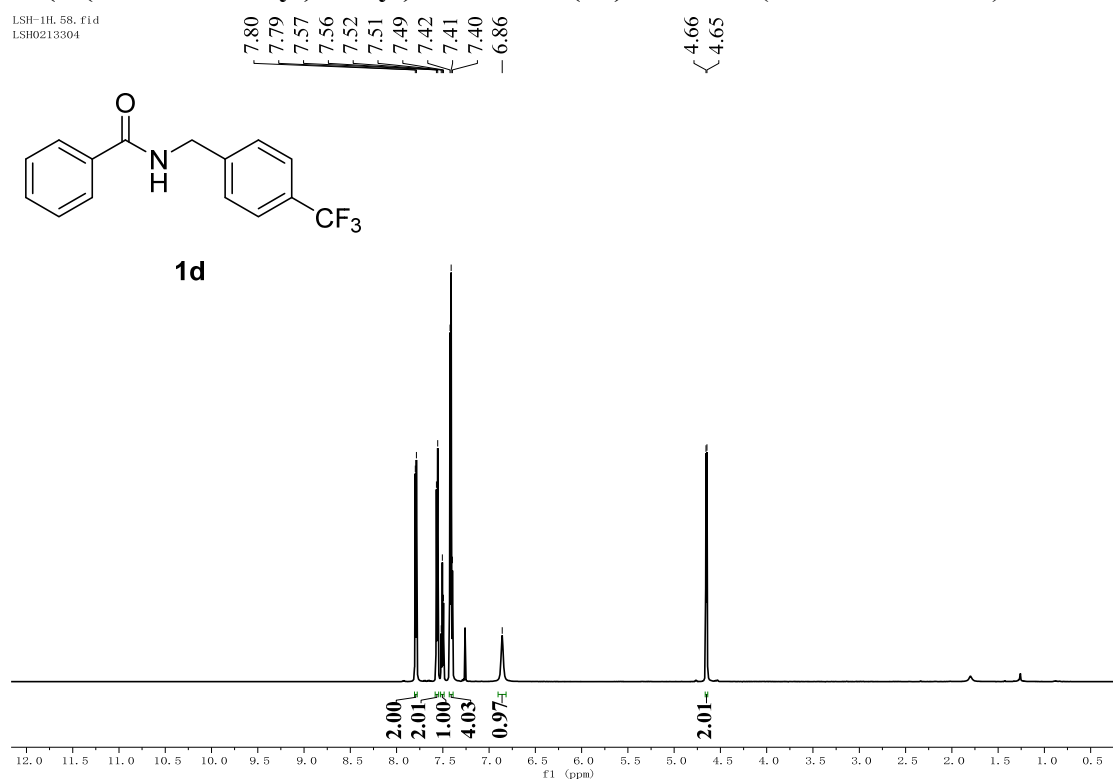

***N*-4-methylbenzyl)benzamide (1e) <sup>1</sup>H NMR (600 MHz, CDCl<sub>3</sub>):**

LSH-1H.2.f1d  
LSH0213102

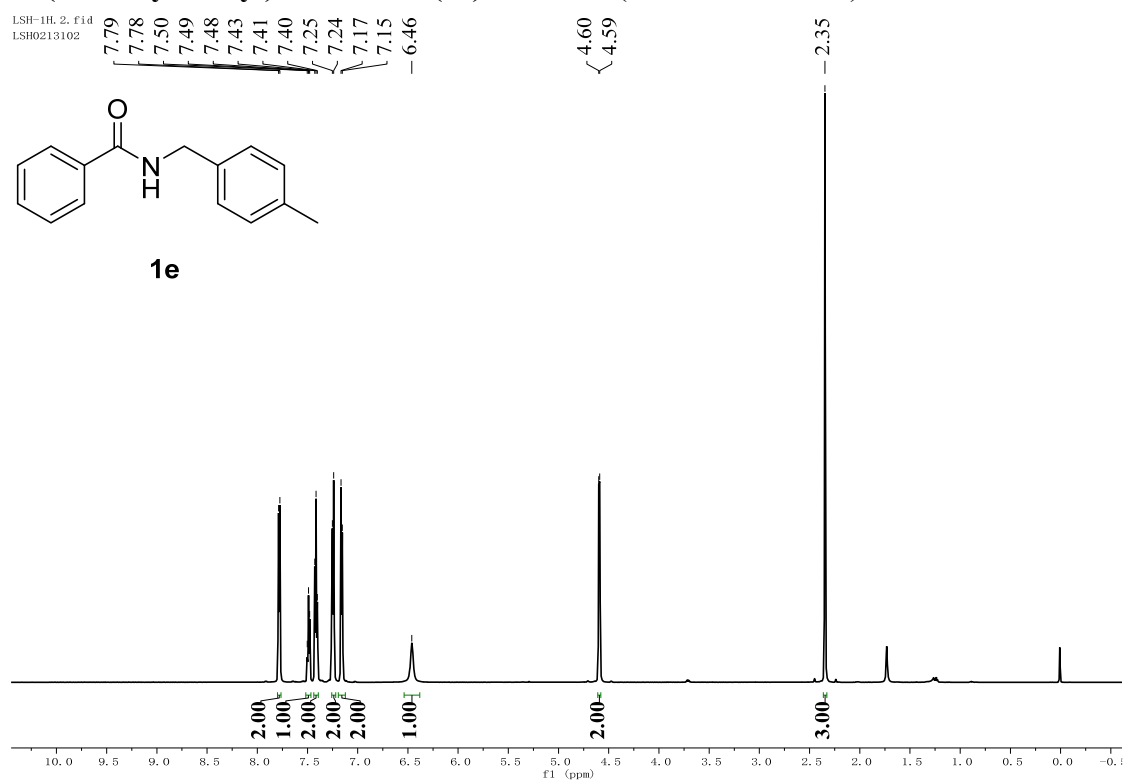



***N*-(3-chlorobenzyl)benzamide (1f) <sup>1</sup>H NMR (600 MHz, CDCl<sub>3</sub>):**

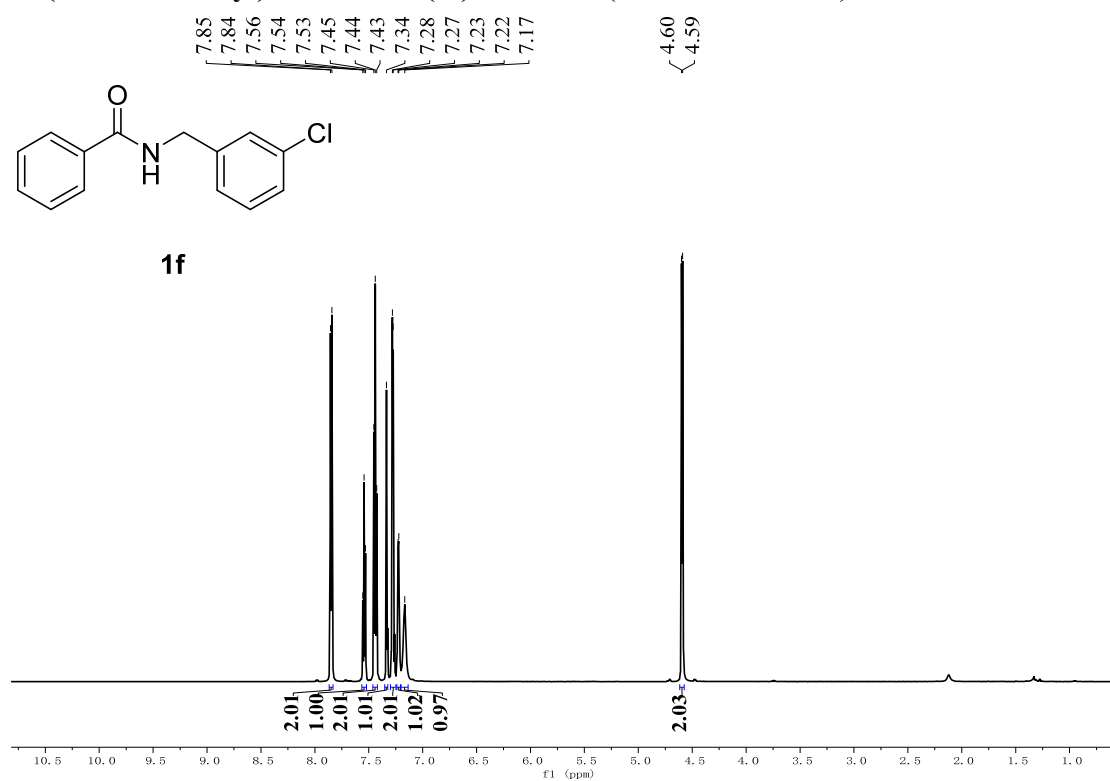

***N*-(3-bromobenzyl)benzamide (1g) <sup>1</sup>H NMR (600 MHz, CDCl<sub>3</sub>):**

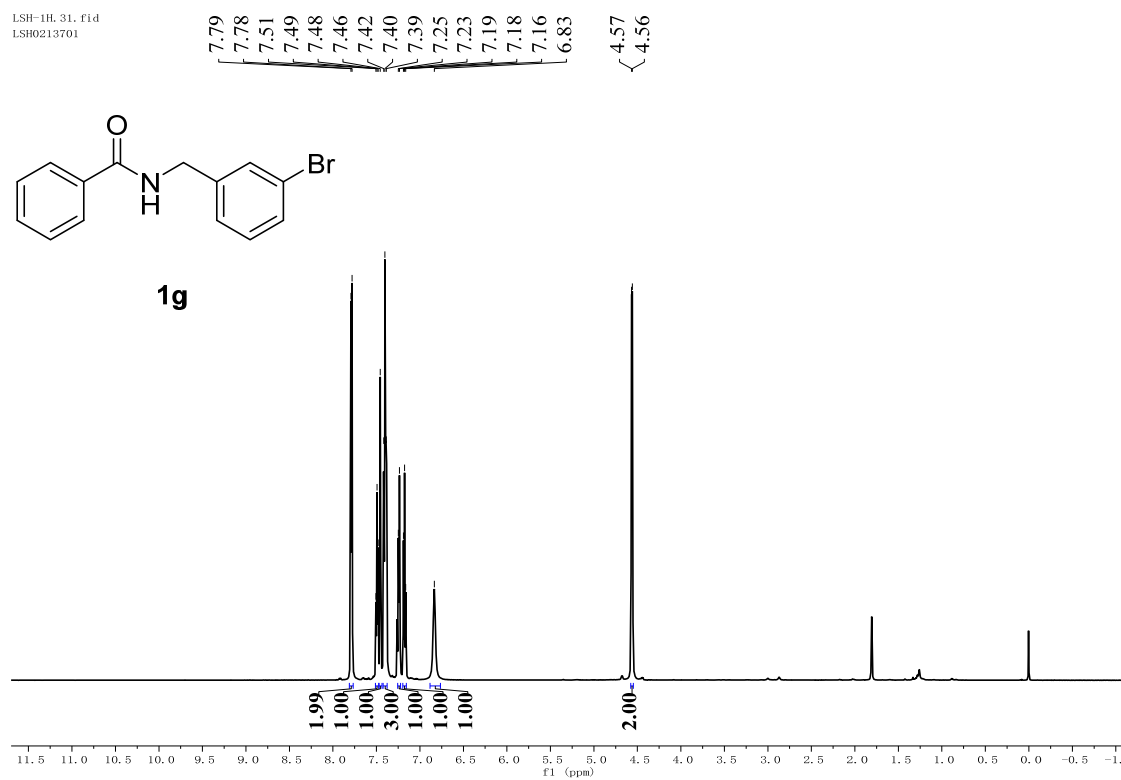

***N*-(3-methoxybenzyl)benzamide (1h) <sup>1</sup>H NMR (600 MHz, CDCl<sub>3</sub>):**

LSH-1H\_56.fid  
LSH031801

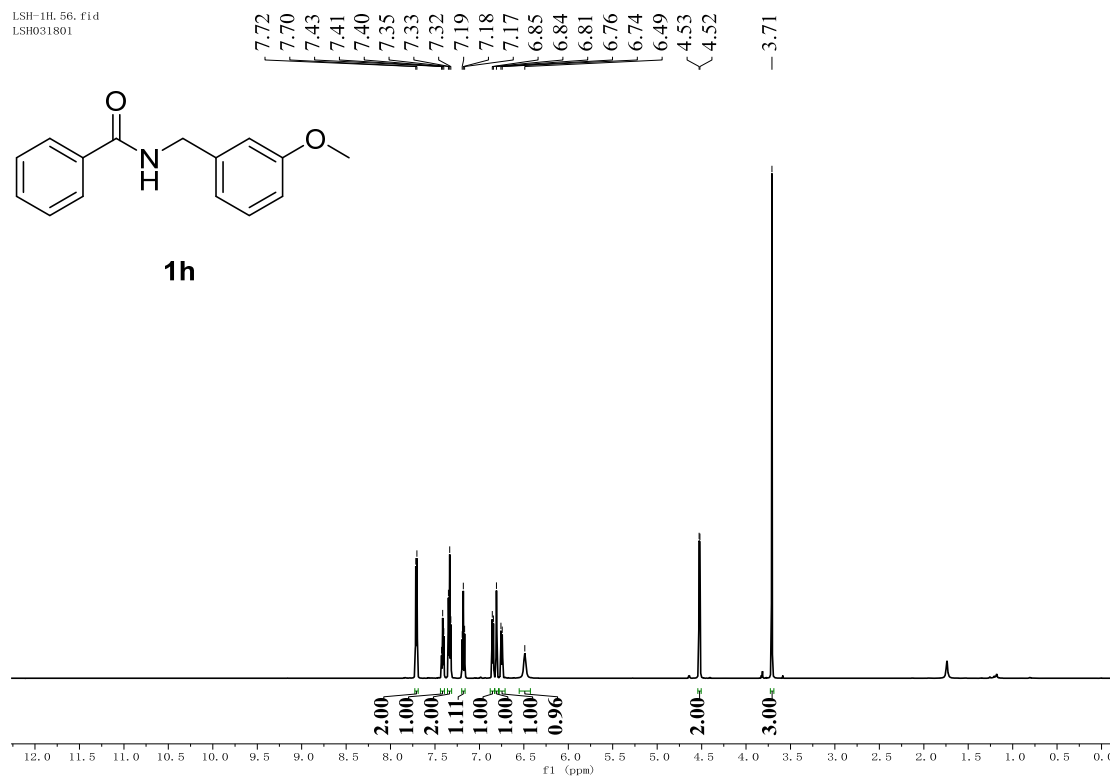

***N*-(2-chlorobenzyl)benzamide (1i) <sup>1</sup>H NMR (600 MHz, CDCl<sub>3</sub>):**

LSH-1H\_67.fid  
LSH0213403

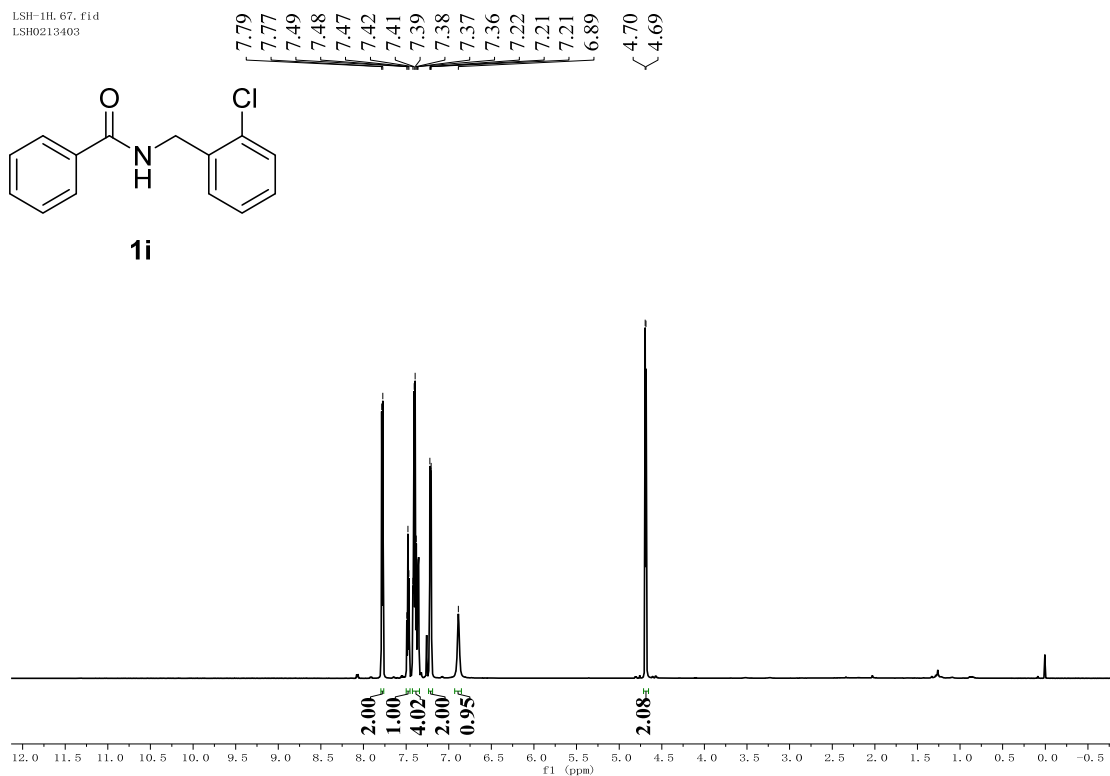

***N*-benzyl-4-(trifluoromethyl)benzamide (1k) <sup>1</sup>H NMR (600 MHz, CDCl<sub>3</sub>):**

LSH-1H\_61.f1d  
LSH0213802

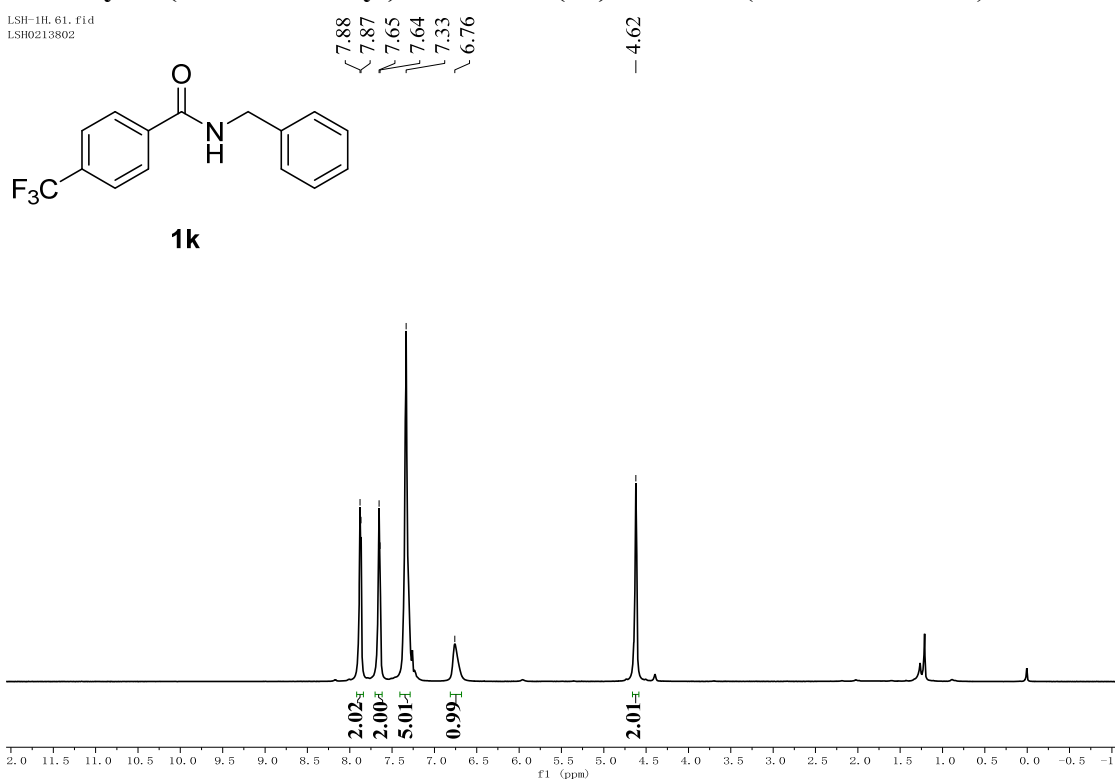

***N*-benzyl-4-methylbenzamide (1l) <sup>1</sup>H NMR (600 MHz, CDCl<sub>3</sub>):**

LSH-1H\_82.f1d  
LSH0212505

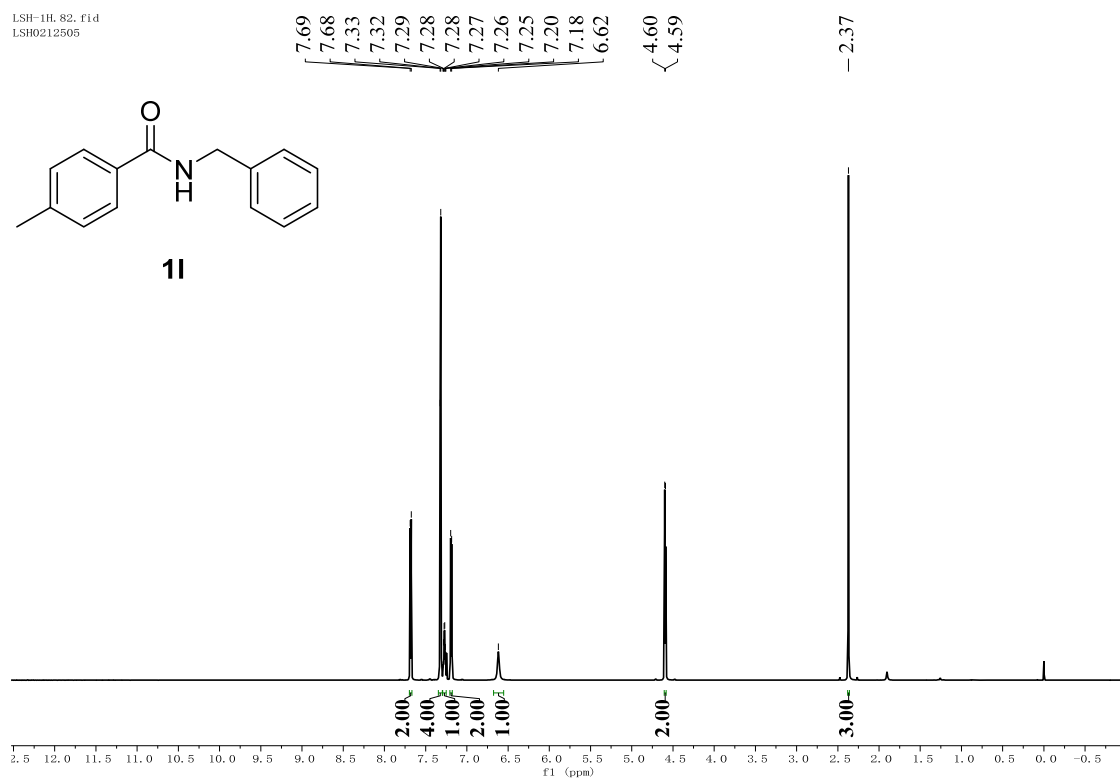

***N*-benzyl-2-chlorobenzamide (1m) <sup>1</sup>H NMR (600 MHz, CDCl<sub>3</sub>):**

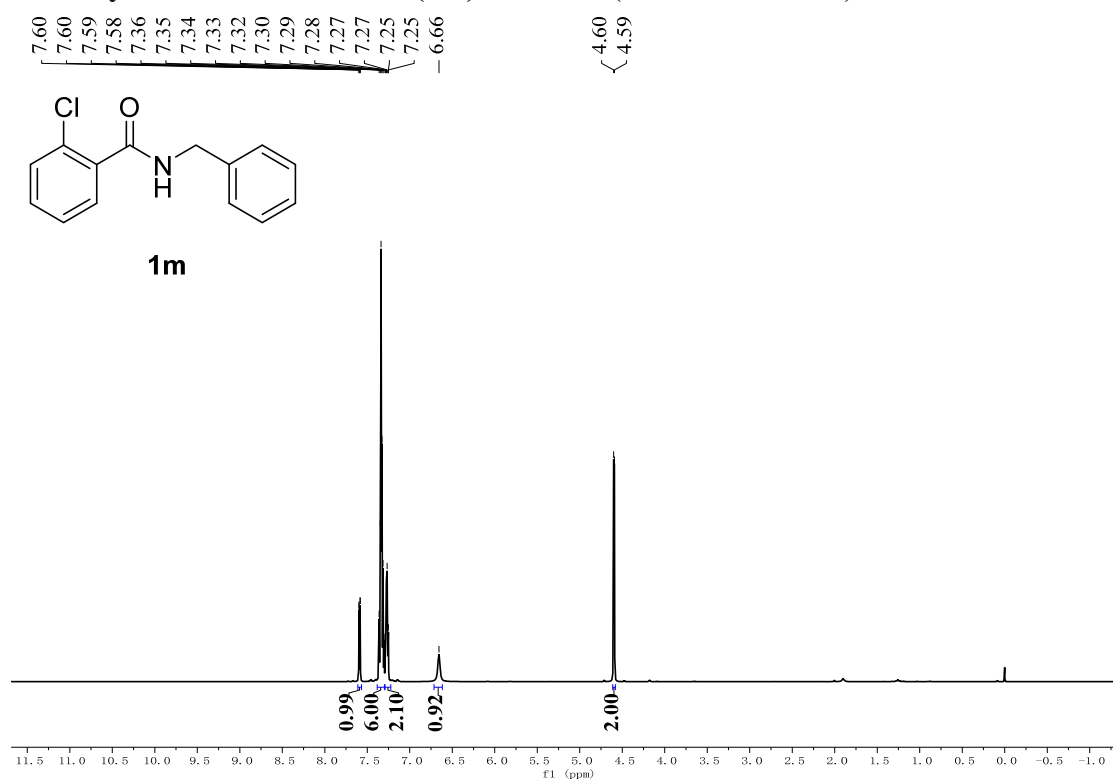

***N*-benzylacetamide (1n) <sup>1</sup>H NMR (600 MHz, CDCl<sub>3</sub>):**

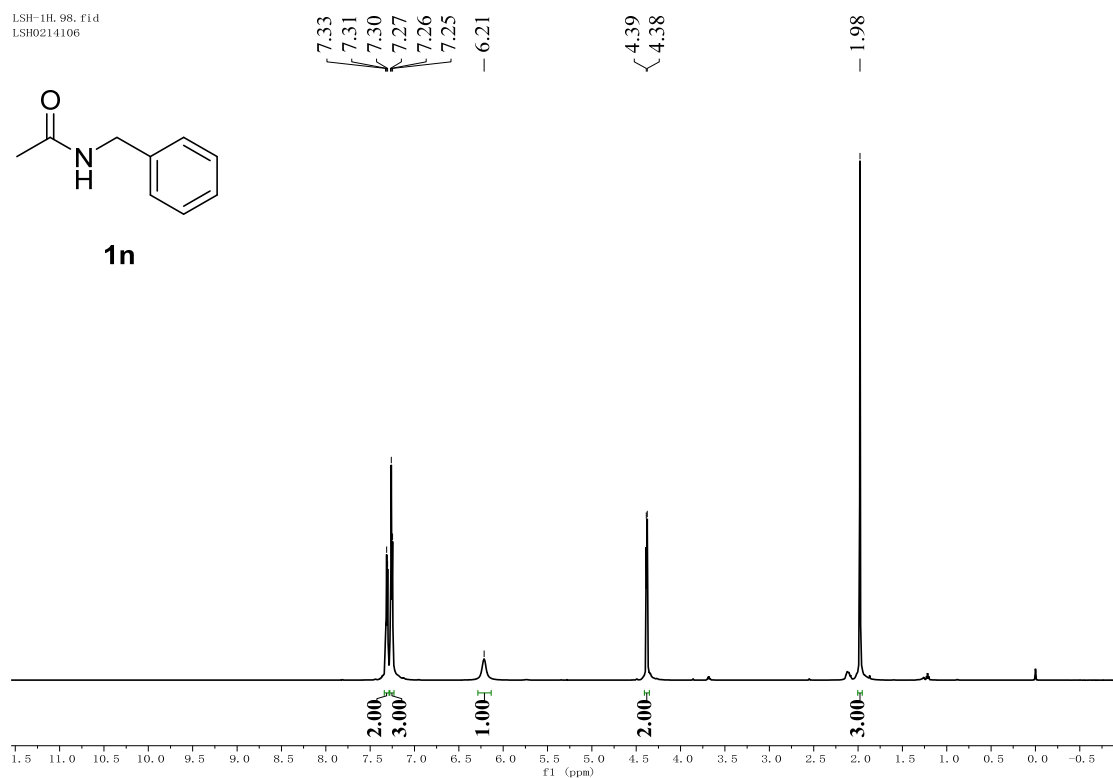

***N*-(4-methylbenzyl)acetamide (1o) <sup>1</sup>H NMR (600 MHz, CDCl<sub>3</sub>):**

LSH-1H\_69.f1d  
LSH0214006

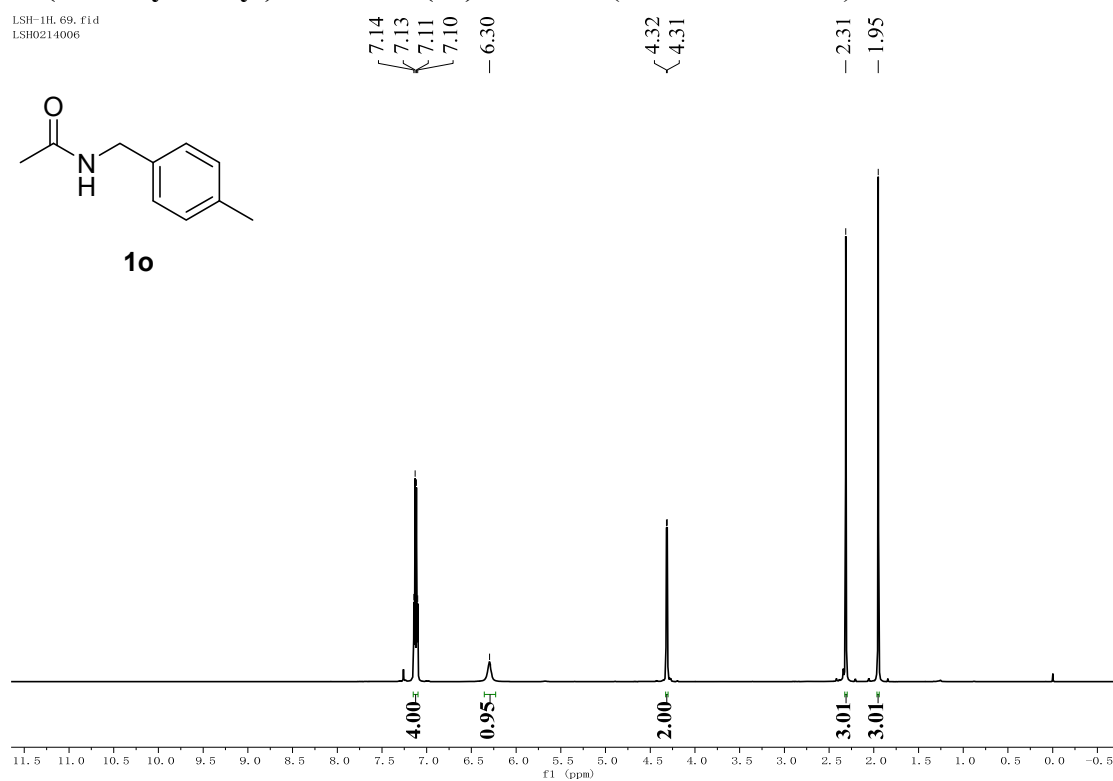

***N*-(4-methoxybenzyl)acetamide (1p) <sup>1</sup>H NMR (600 MHz, CDCl<sub>3</sub>):**

LSH-1H\_46.f1d  
LSH031303

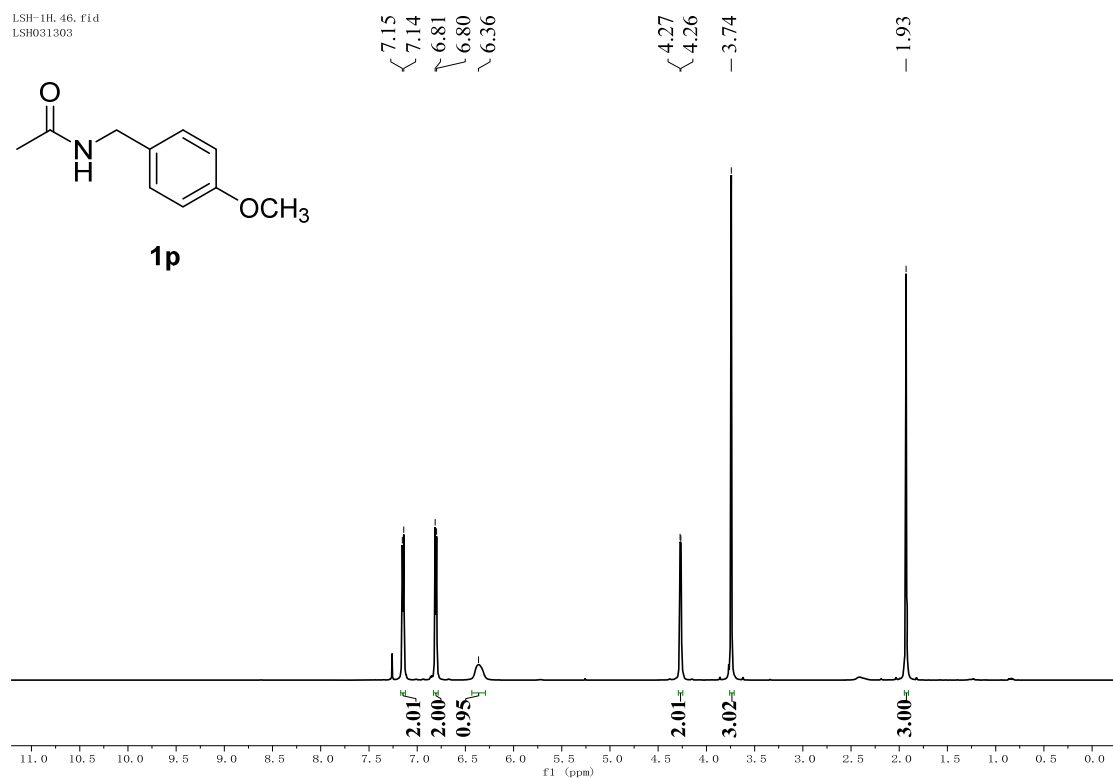

***N*-(4-chlorobenzyl)acetamide (1q) <sup>1</sup>H NMR (600 MHz, CDCl<sub>3</sub>):**

LSH-1H.68. f1d  
LSH0214503

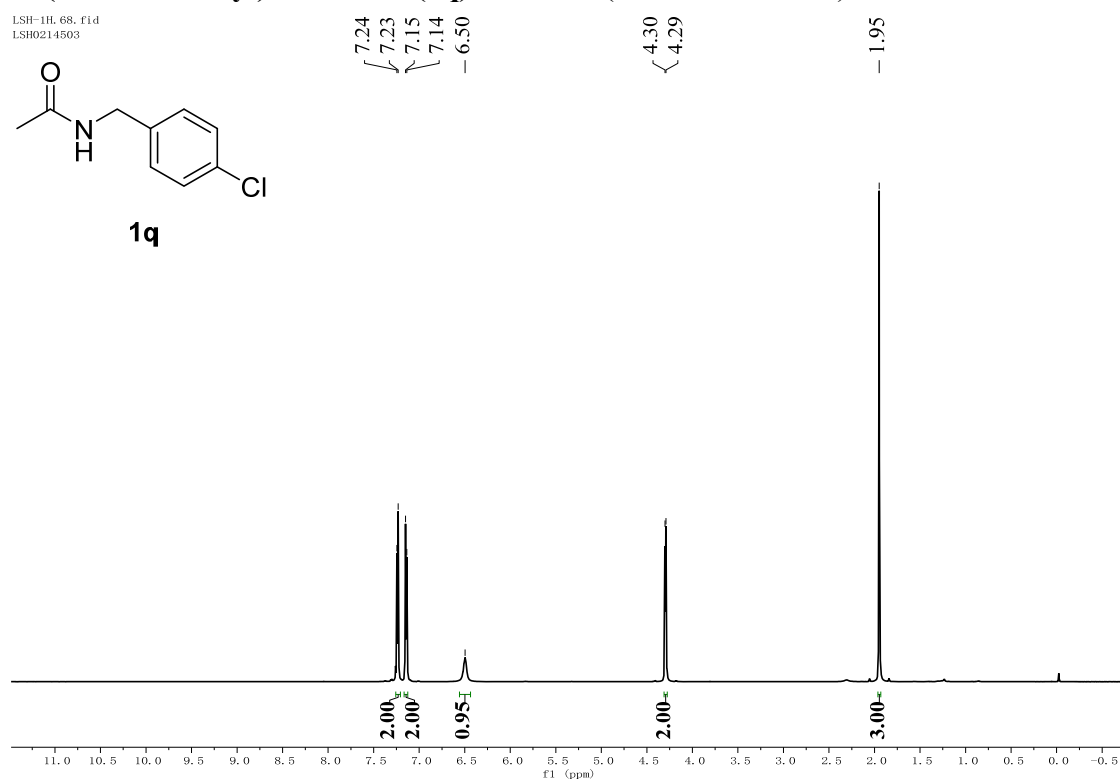

***N*-(3-chlorobenzyl)acetamide (1r) <sup>1</sup>H NMR (600 MHz, CDCl<sub>3</sub>):**

LSH-1H.63. f1d  
LSH031302

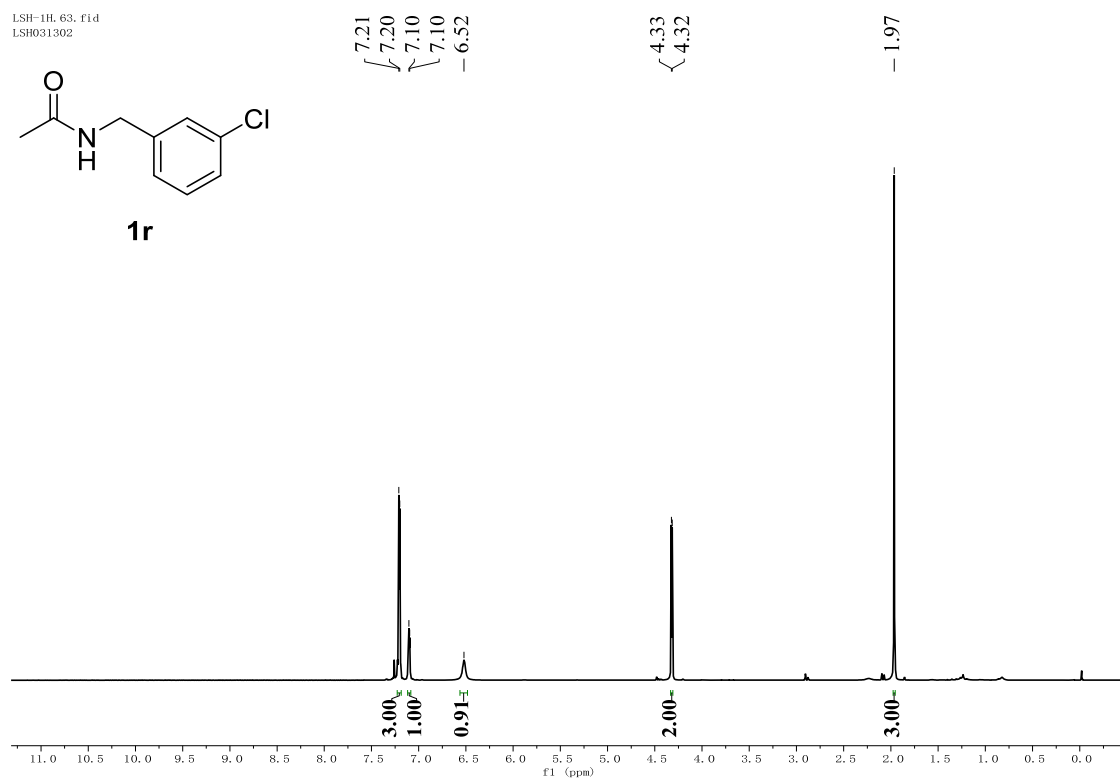

***N*-(2-chlorobenzyl)acetamide (1s) <sup>1</sup>H NMR (600 MHz, CDCl<sub>3</sub>):**

LSH-1H.80. f1d  
LSH02114504

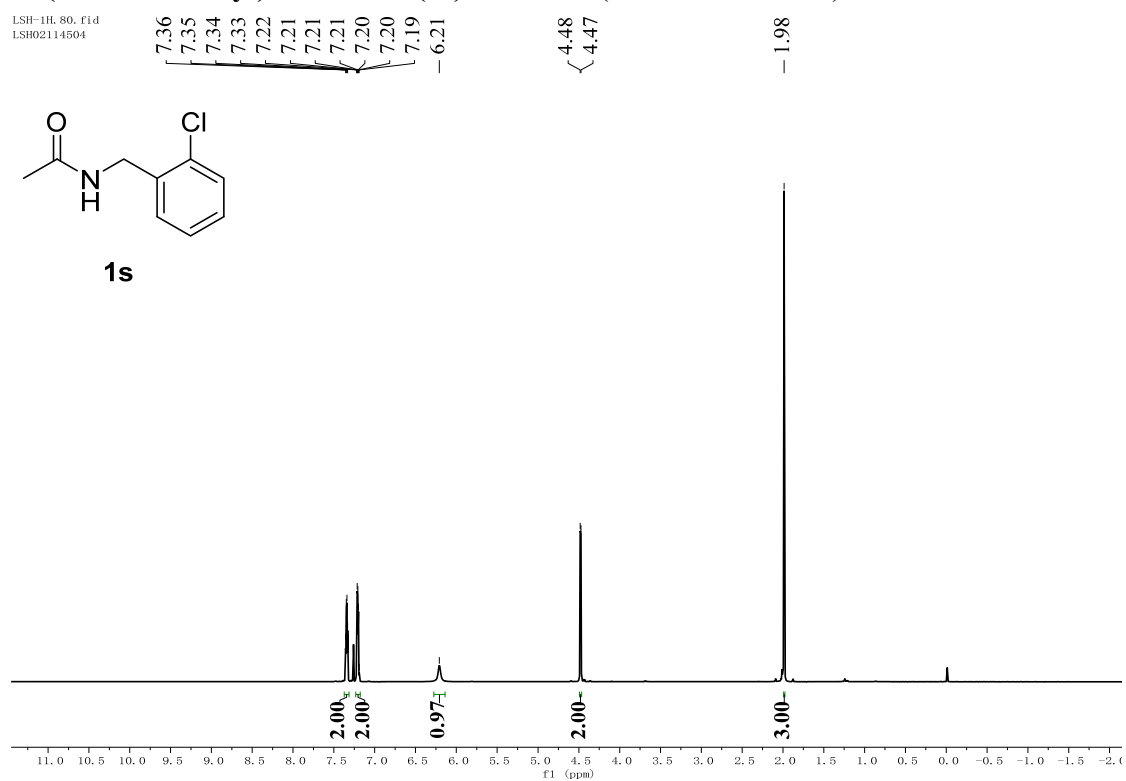

***N*-(3,4-dichlorobenzyl)acetamide (1t) <sup>1</sup>H NMR (600 MHz, CDCl<sub>3</sub>):**

LSH-1H.77. f1d  
LSH0214502

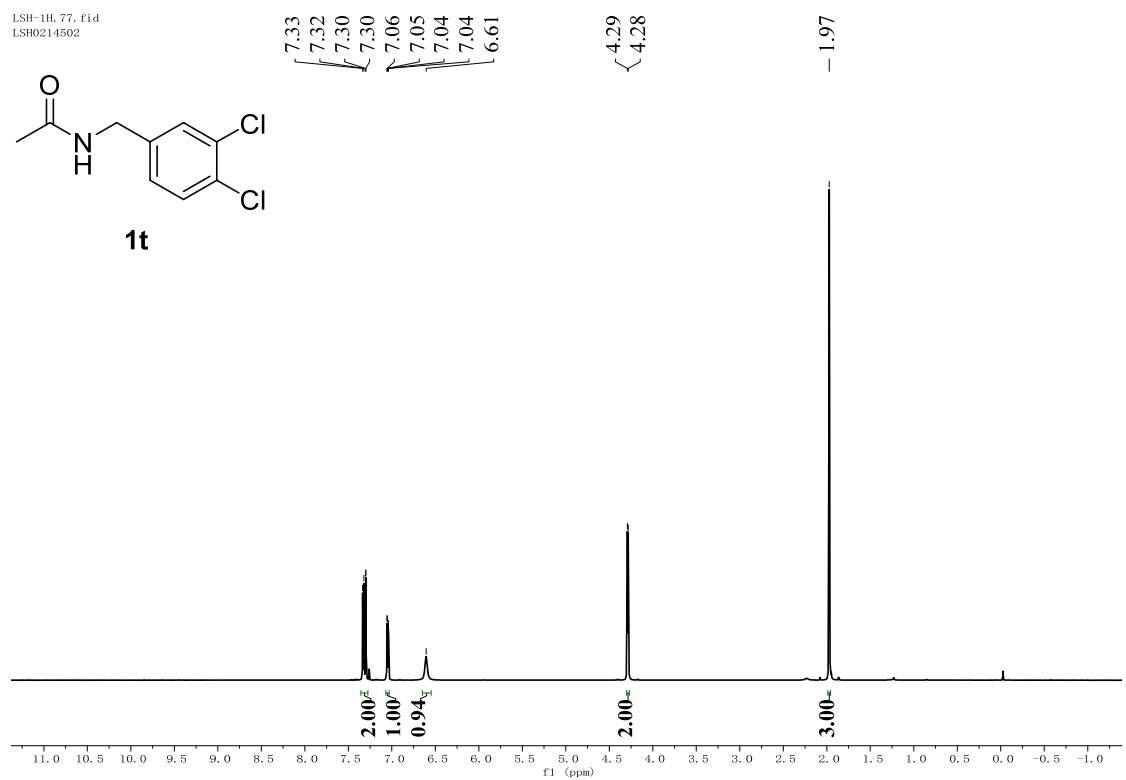

***N*-benzylpivalamide (1u) <sup>1</sup>H NMR (600 MHz, CDCl<sub>3</sub>):**

LSH-1H\_45.f1d  
LSH031301

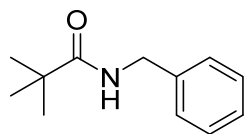

**1u**

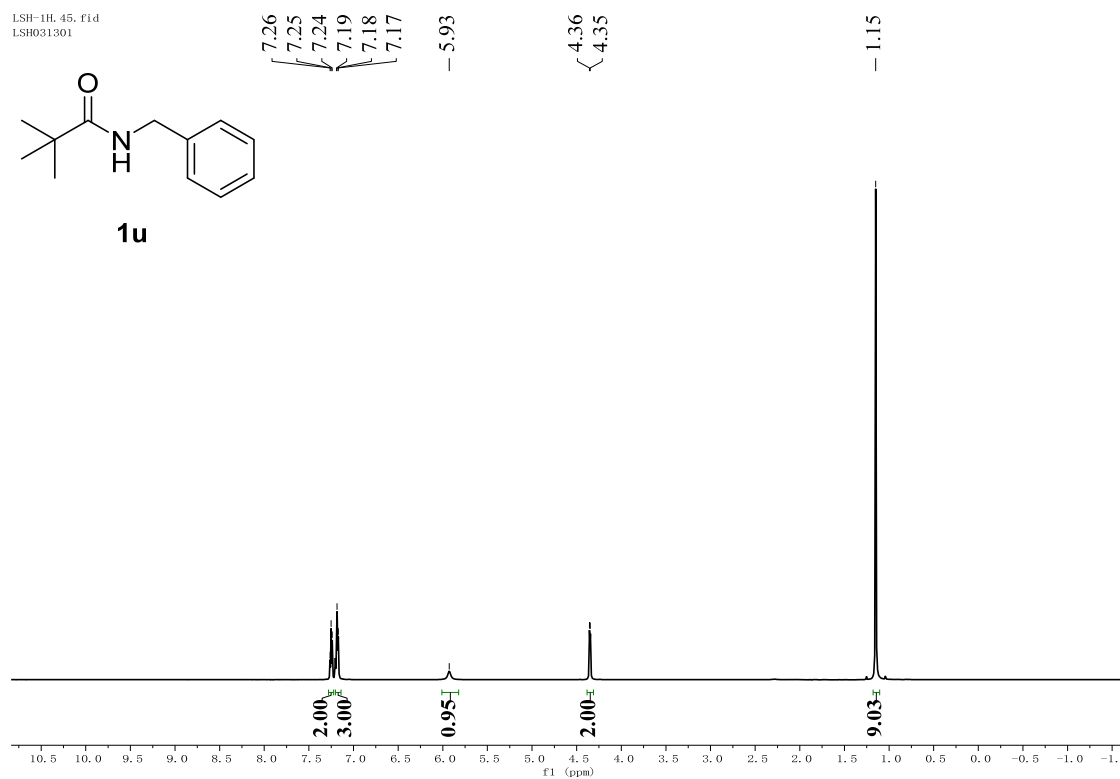

***N*-benzylmethanesulfonamide (1v) <sup>1</sup>H NMR (600 MHz, CDCl<sub>3</sub>):**

LSH-1H\_5.f1d  
LSH0214804

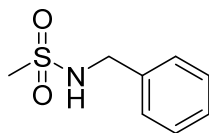

**1v**

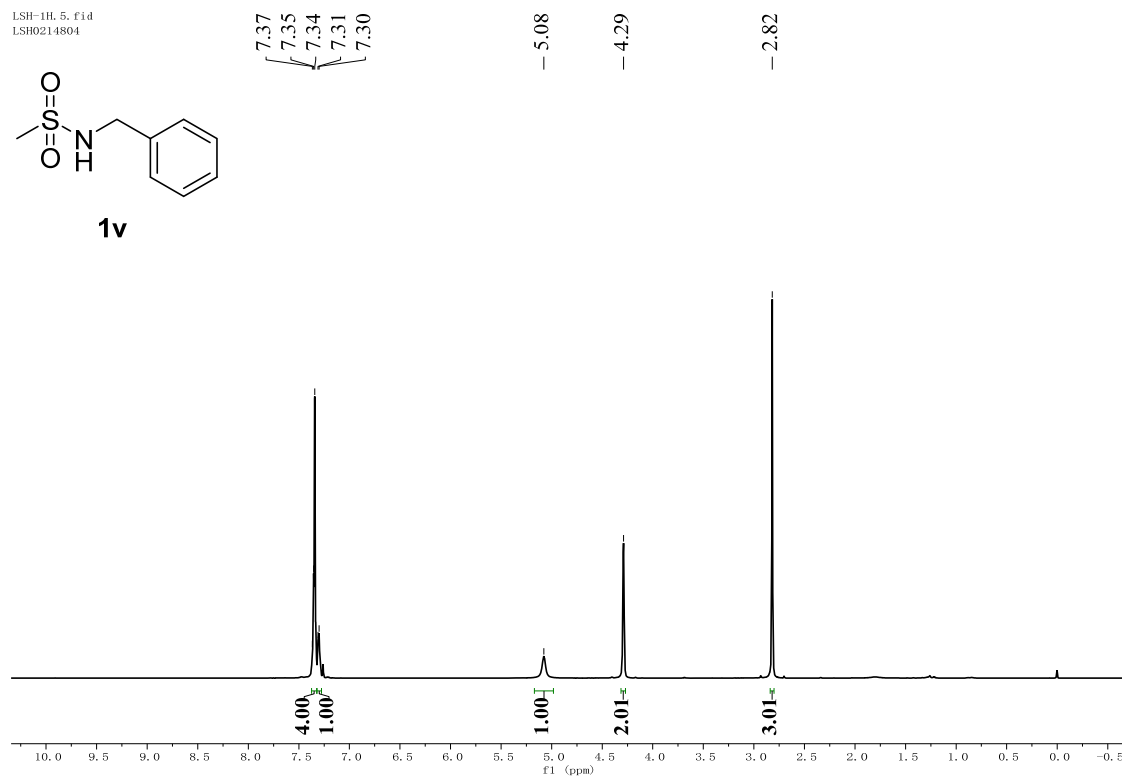



***N*-benzylbenzenesulfonamide (1w) <sup>1</sup>H NMR (600 MHz, CDCl<sub>3</sub>):**

LSH-1H.78.fid  
LSH0214803

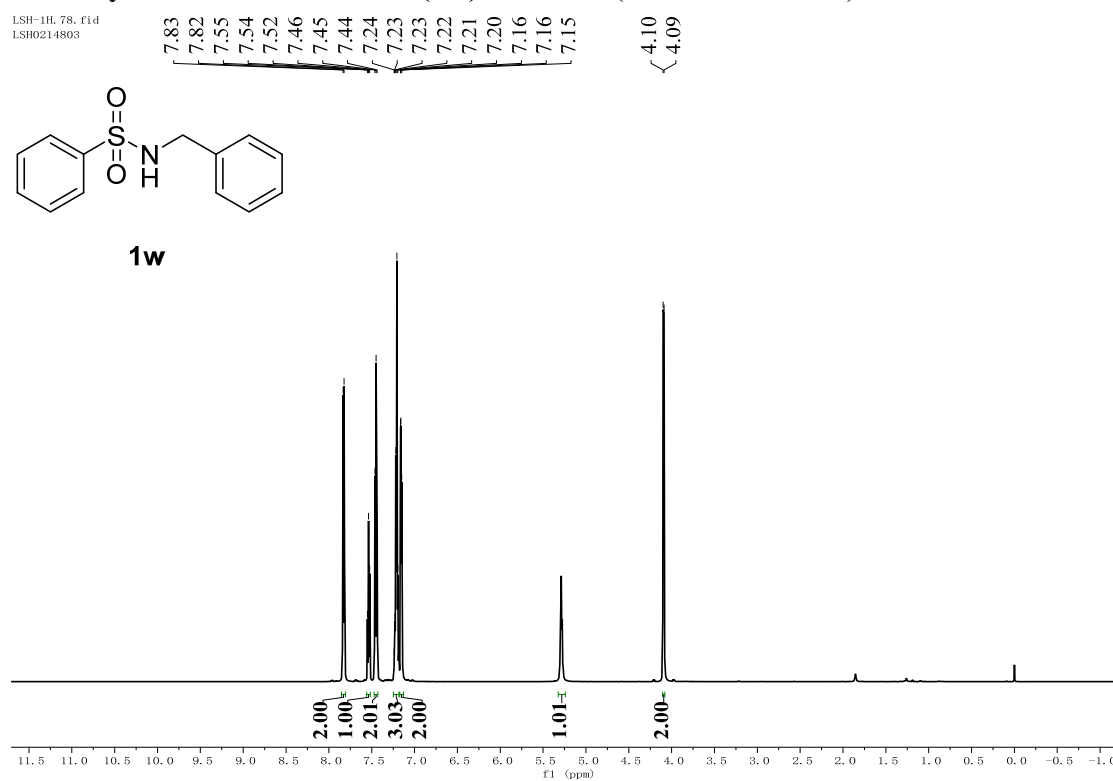

***N*-hexylbutyramide (1aa) <sup>1</sup>H NMR (600 MHz, CDCl<sub>3</sub>):**

LSH-1H.74.fid  
LSH03210202

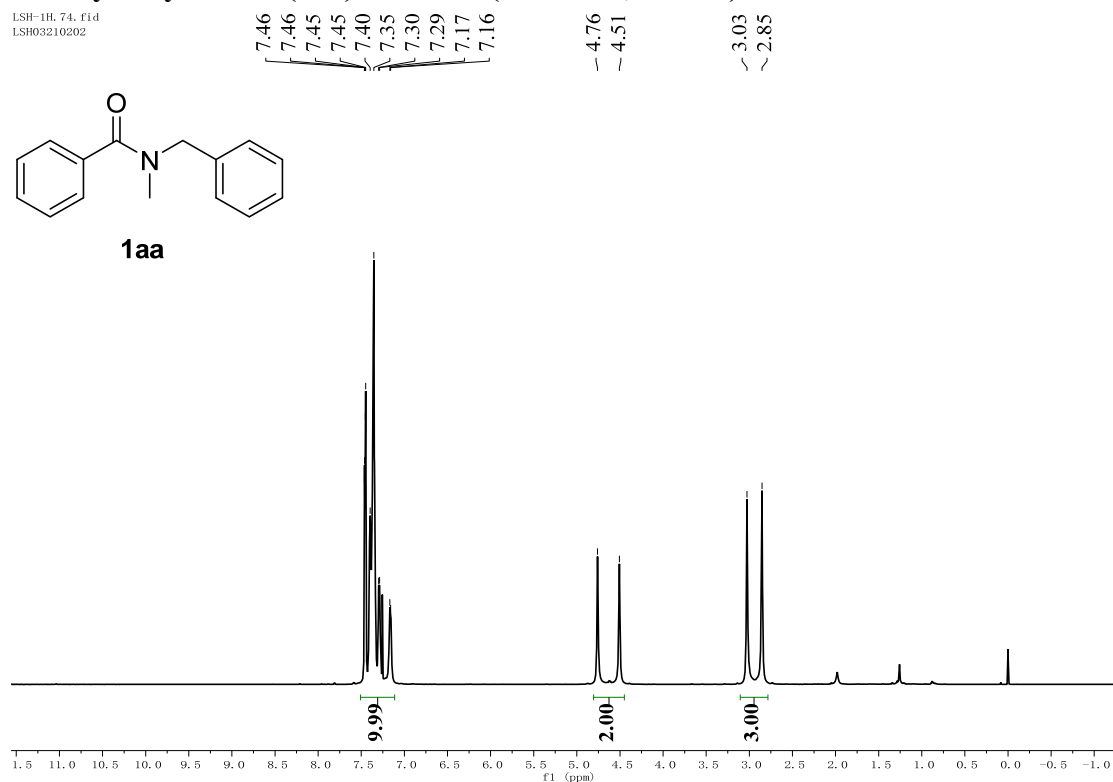

***N*-(cyanomethyl)benzamide (1ae) <sup>1</sup>H NMR (600 MHz, CDCl<sub>3</sub>):**

LSH-1H\_4.fid  
LSH043101

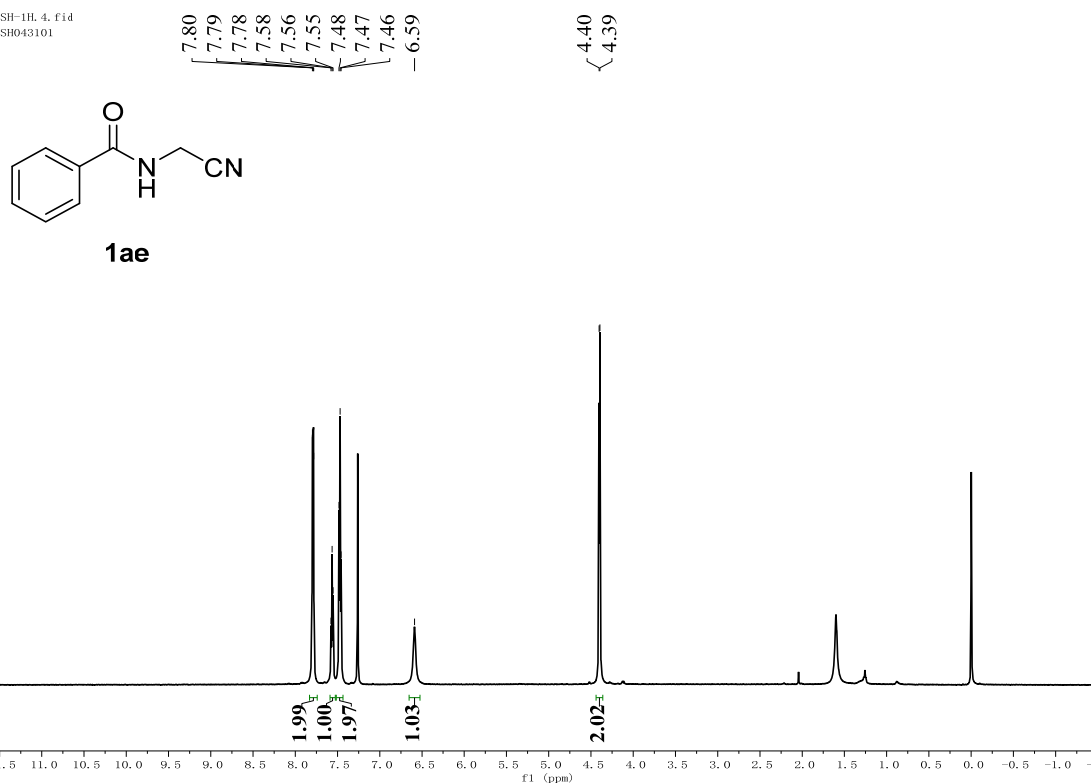

***N*-benzoylbenzamide (2a) <sup>1</sup>H NMR (600 MHz, CDCl<sub>3</sub>):**

LSH-1H\_24.fid  
LSH 0214602

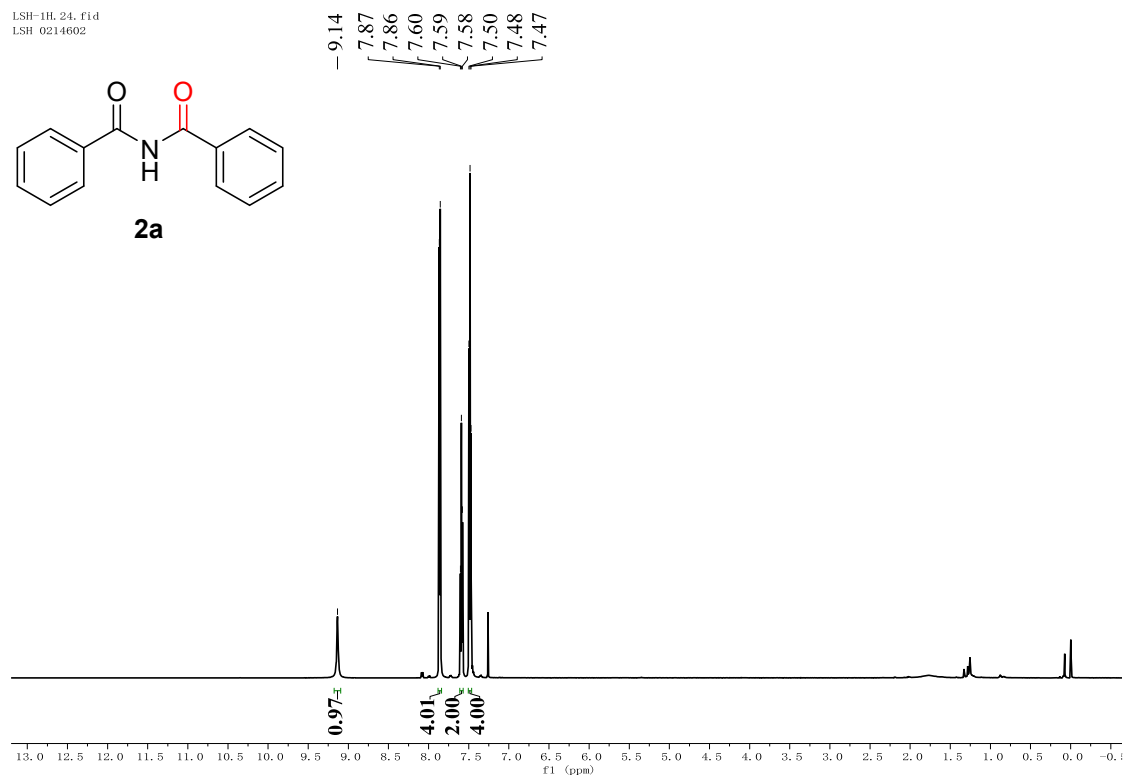

***N*-benzoyl-4-chlorobenzamide (2b) <sup>1</sup>H NMR (600 MHz, CDCl<sub>3</sub>):**

LSH-1H\_26.fid  
LSH030103

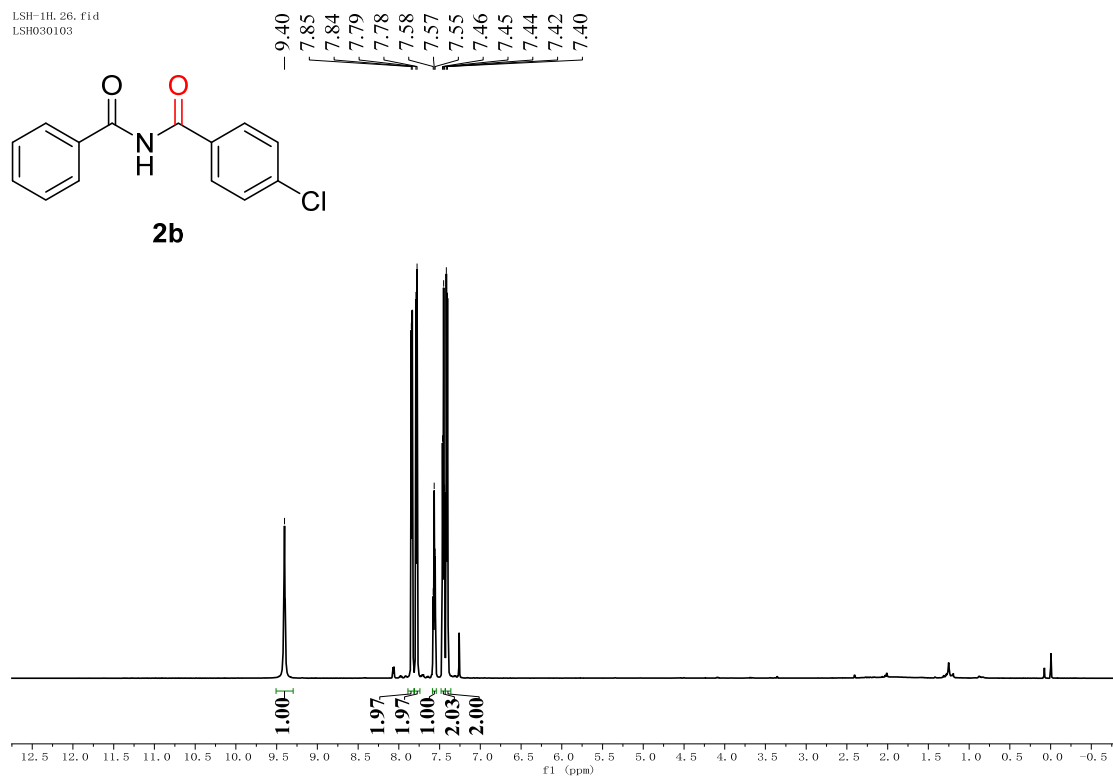

***N*-benzoyl-4-bromobenzamide (2c) <sup>1</sup>H NMR (600 MHz, CDCl<sub>3</sub>):**

LSH-1H\_47.fid  
LSH031401

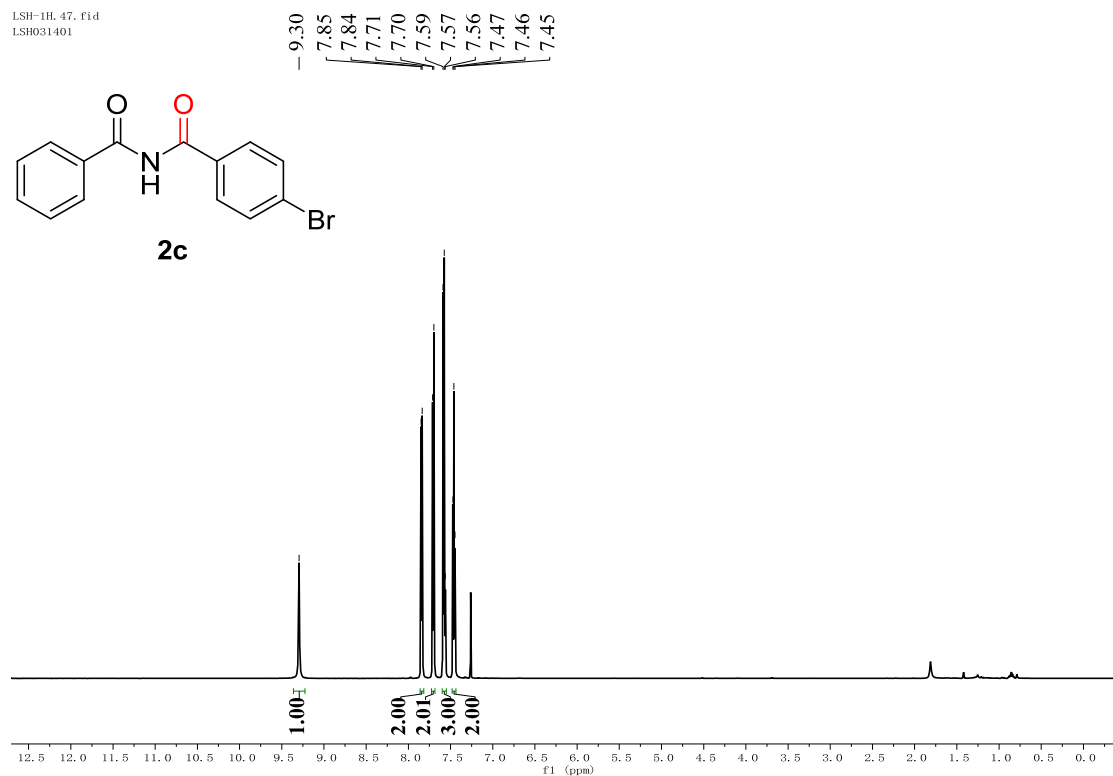

***N*-benzoyl-4-(trifluoromethyl)benzamide (2d) <sup>1</sup>H NMR (600 MHz, CDCl<sub>3</sub>):**

LSH-1H\_43.fid  
LSH031101

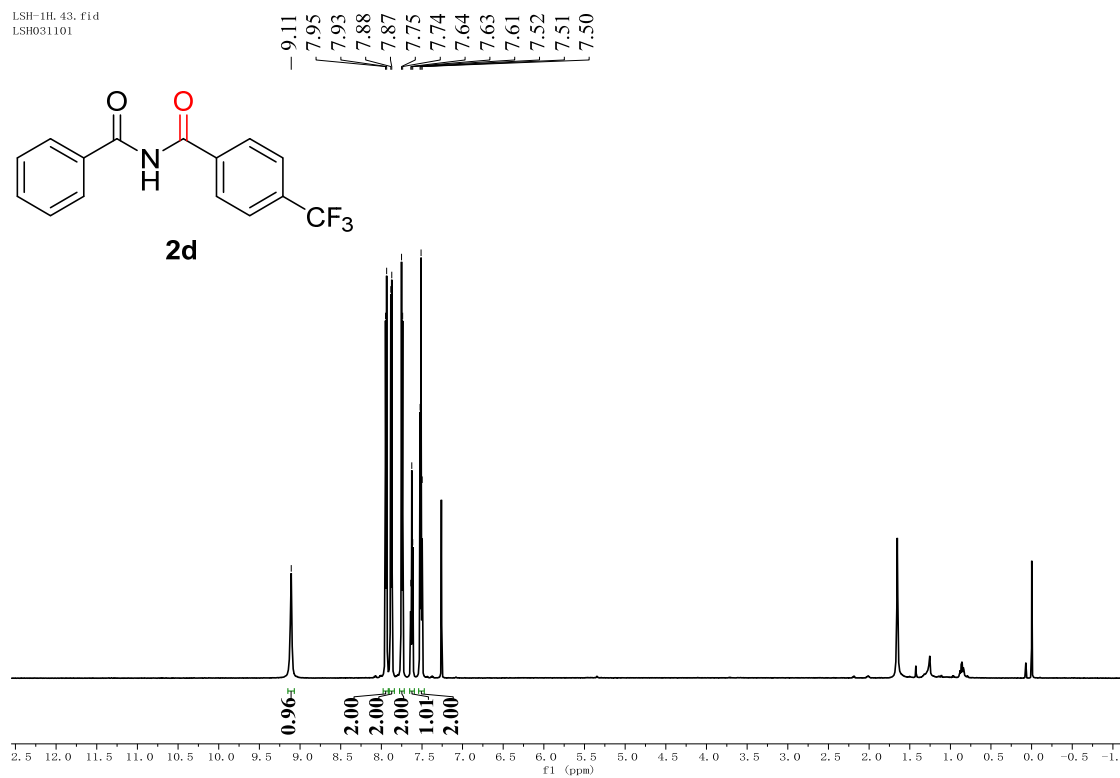

***N*-benzoyl-4-methylbenzamide (2e) <sup>1</sup>H NMR (600 MHz, CDCl<sub>3</sub>):**

LSH-1H\_62.fid  
LSH031601

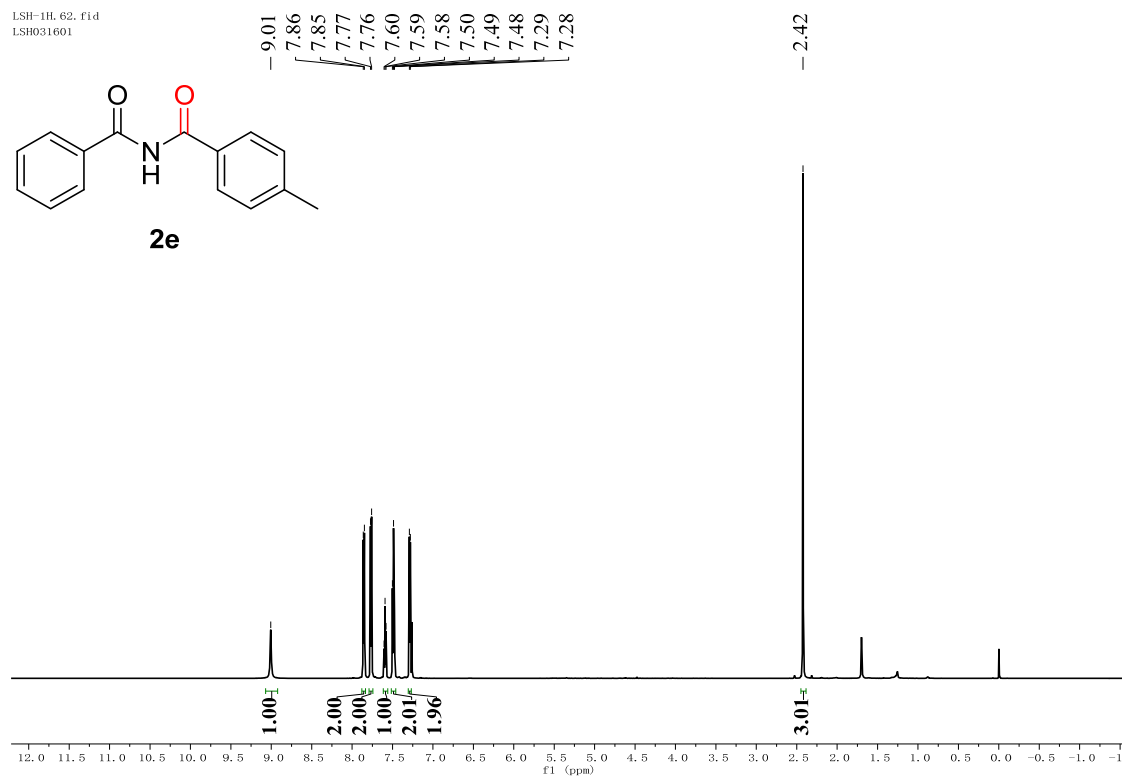

***N*-benzoyl-3-chlorobenzamide (2f) <sup>1</sup>H NMR (600 MHz, CDCl<sub>3</sub>):**

LSH-1H\_41.fid  
LSH031201

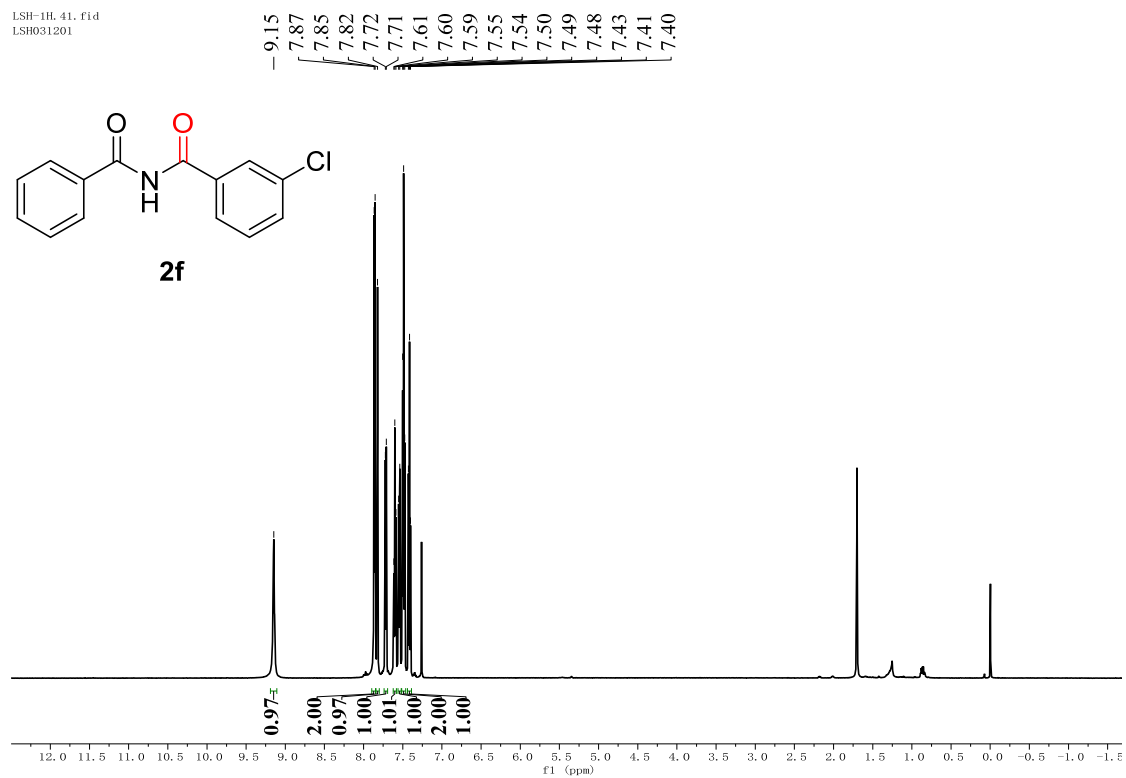

***N*-benzoyl-3-bromobenzamide (2g) <sup>1</sup>H NMR (600 MHz, CDCl<sub>3</sub>):**

LSH-1H\_42.fid  
LSH031202

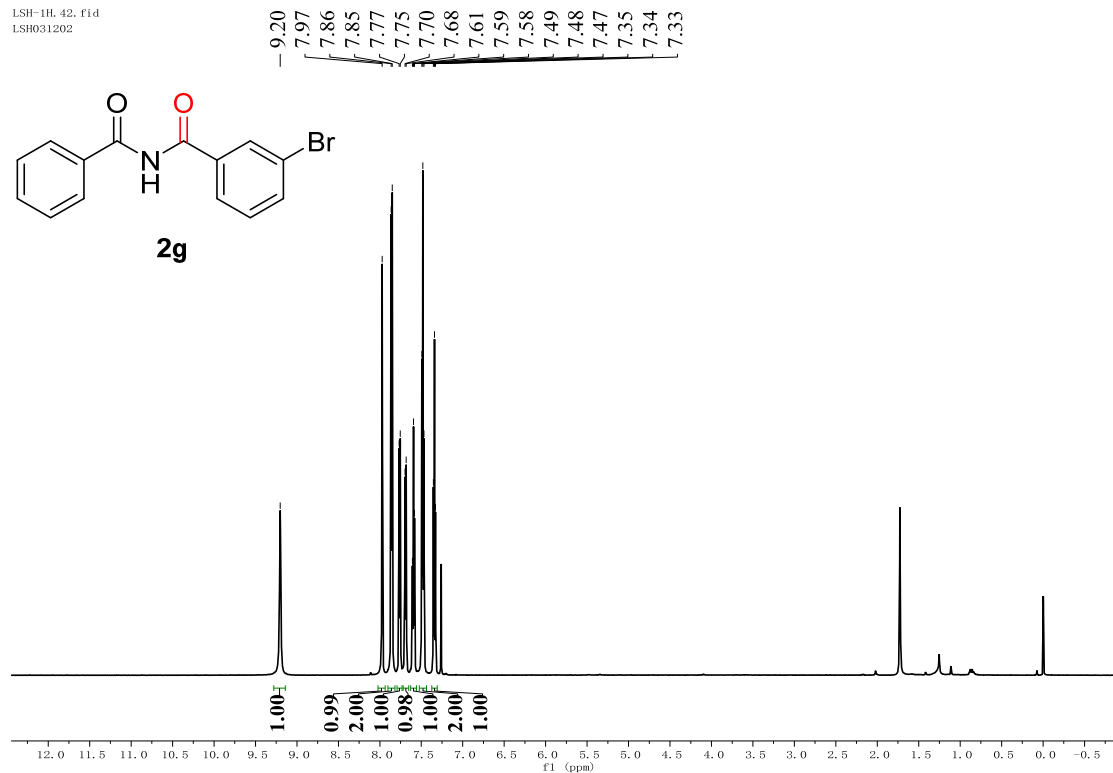

***N*-benzoyl-3-methoxybenzamide (2h) <sup>1</sup>H NMR (600 MHz, CDCl<sub>3</sub>):**

LSH-1H\_90.fid  
LSH032601

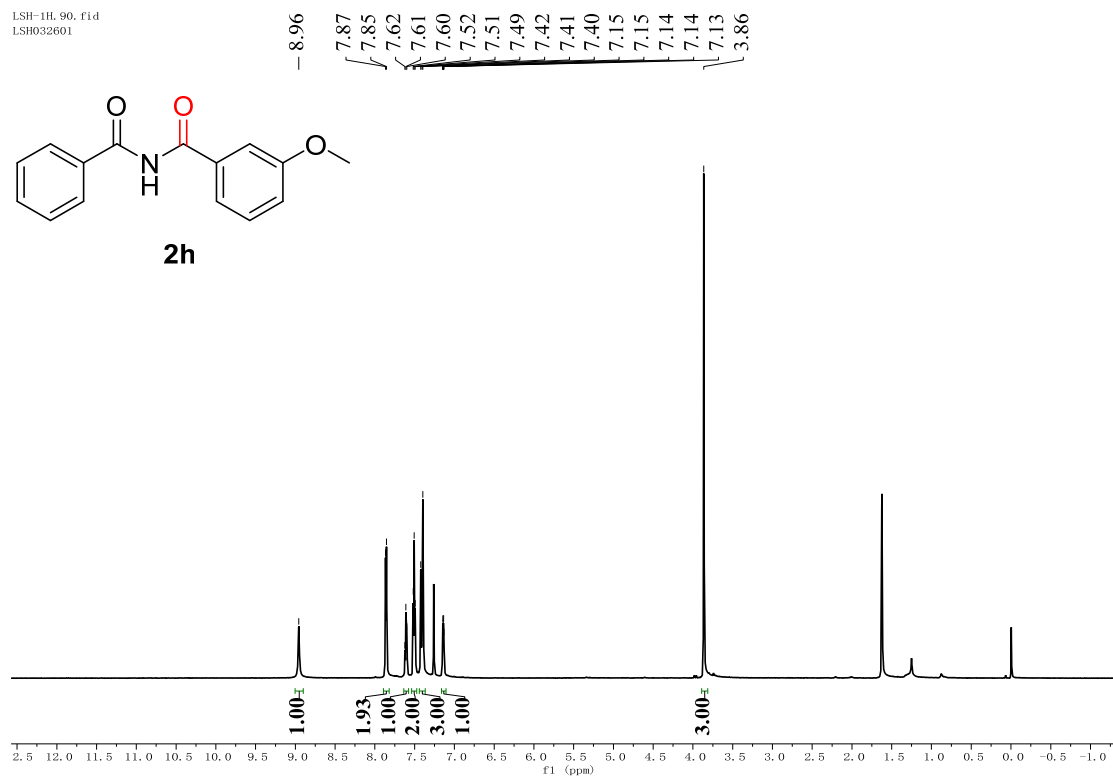

***N*-benzoyl-2-chlorobenzamide (2i) <sup>1</sup>H NMR (600 MHz, CDCl<sub>3</sub>):**

LSH-1H\_71.fid  
LSH032002

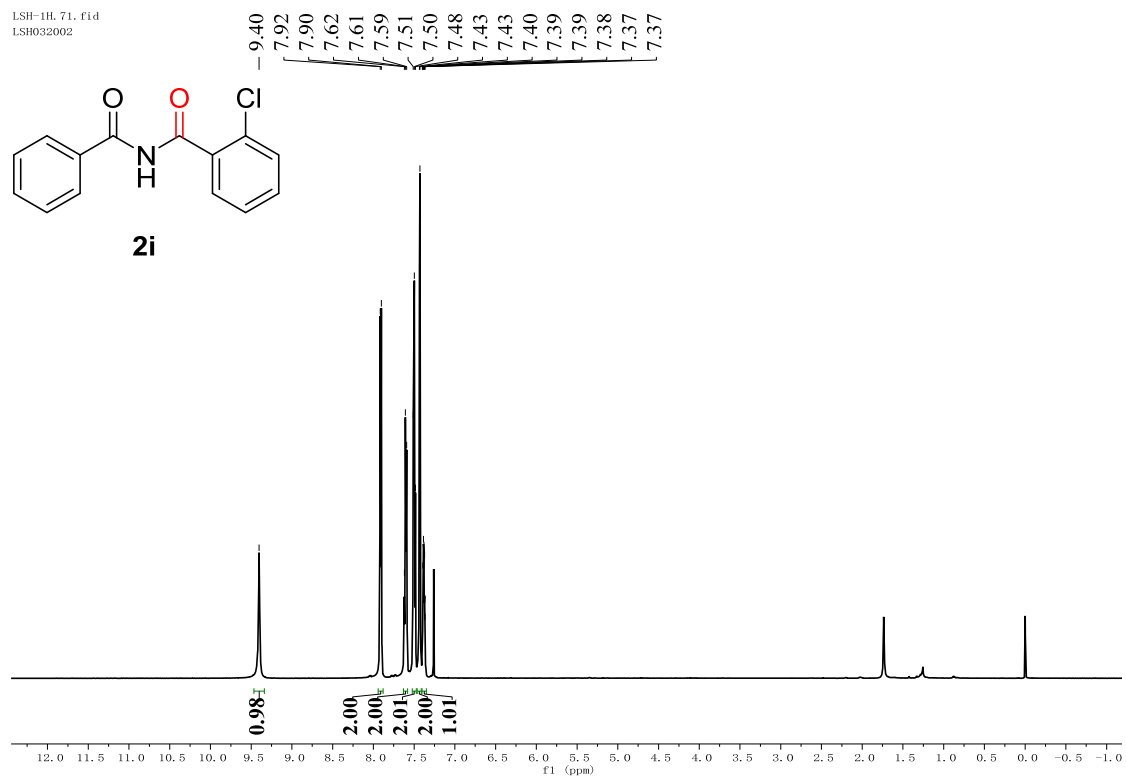

***N*-acetylbenzamide (2j) <sup>1</sup>H NMR (600 MHz, CDCl<sub>3</sub>):**

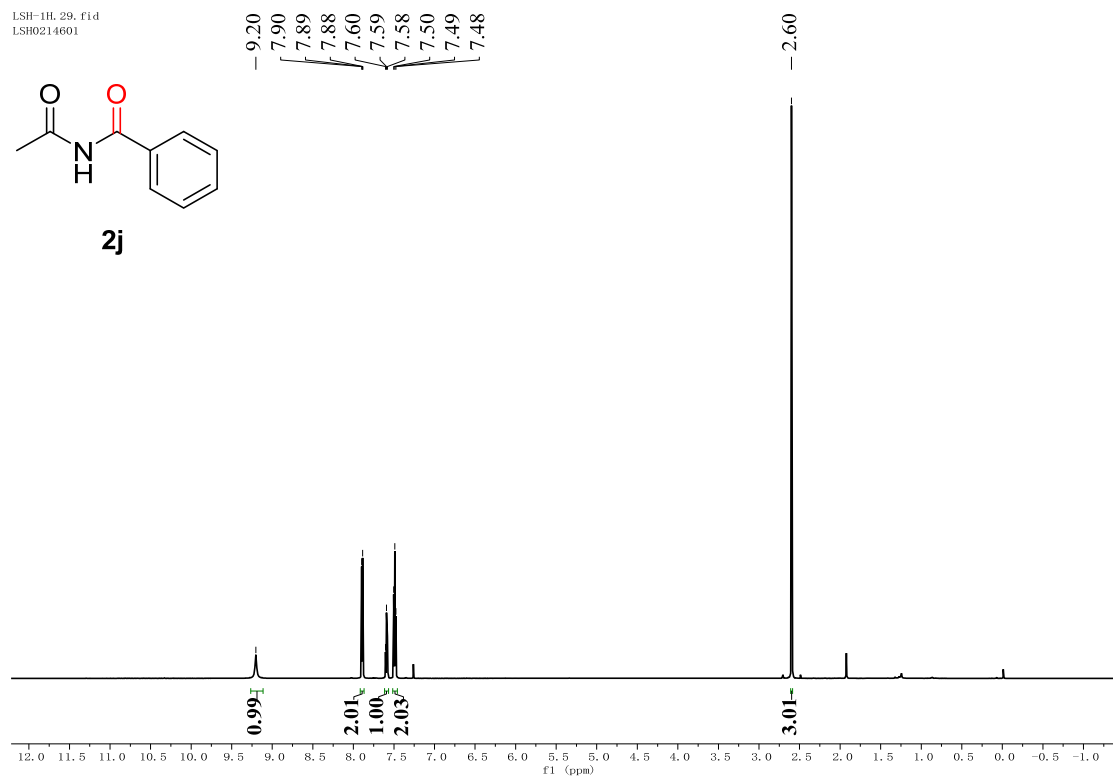

***N*-acetyl-4-methylbenzamide (2k) <sup>1</sup>H NMR (600 MHz, CDCl<sub>3</sub>):**

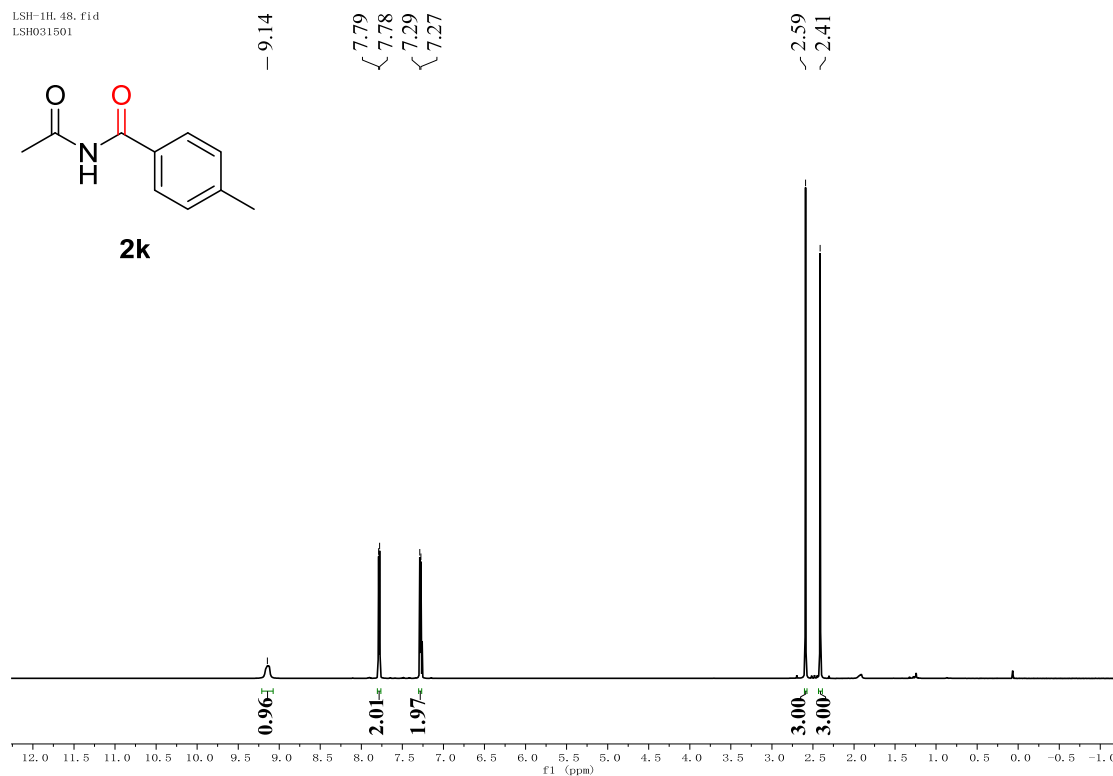

***N*-acetyl-4-methoxybenzamide (2l) <sup>1</sup>H NMR (600 MHz, CDCl<sub>3</sub>):**

LSH-1H\_55.f1d  
LSH031602

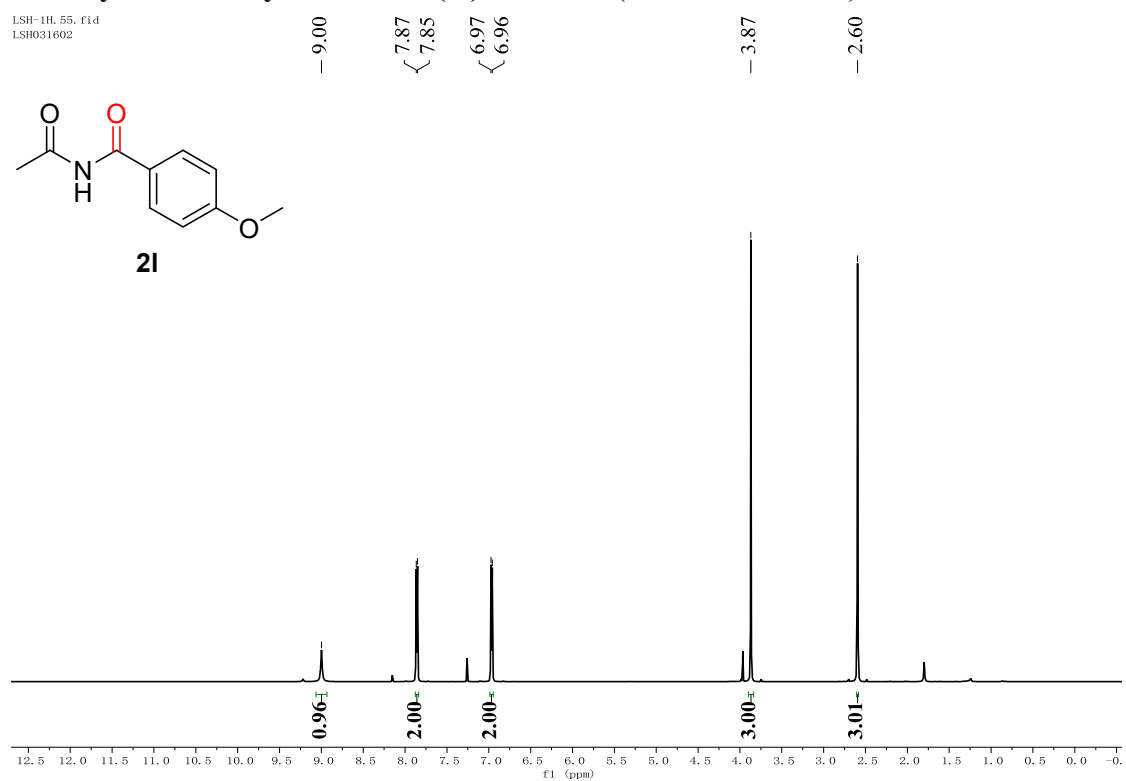

***N*-acetyl-4-chlorobenzamide (2m) <sup>1</sup>H NMR (600 MHz, CDCl<sub>3</sub>):**

LSH-1H\_25.f1d  
LSH 0214701

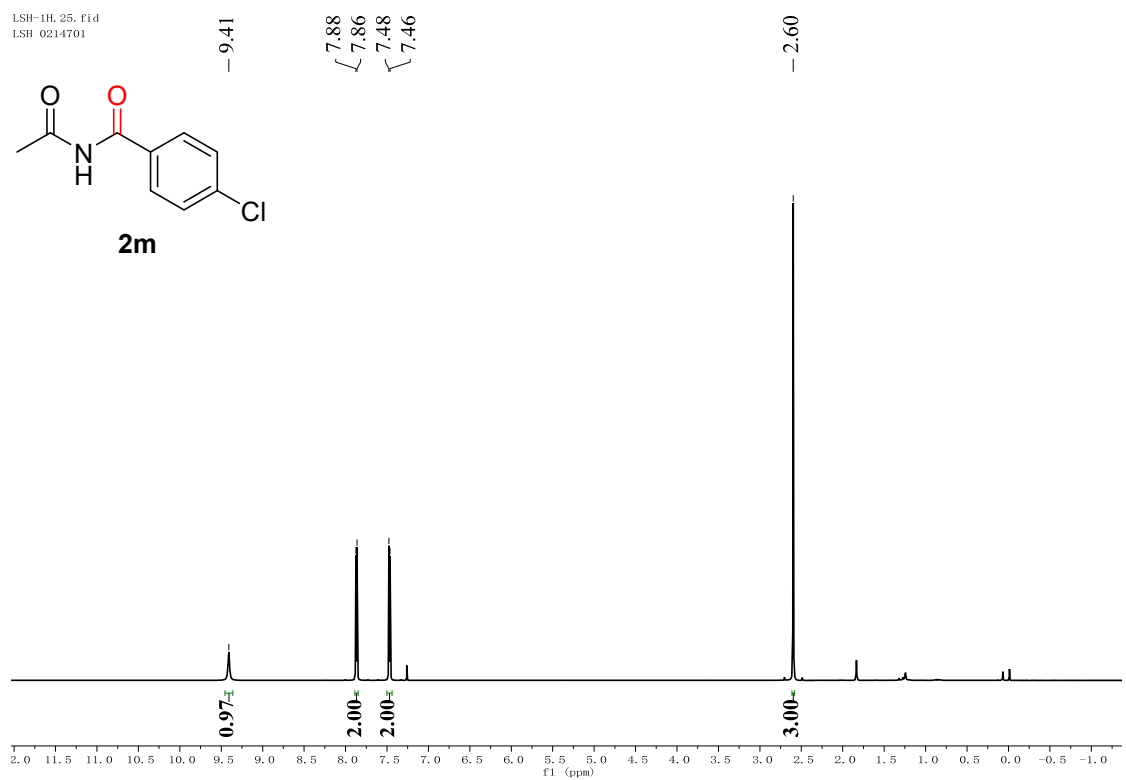



***N*-acetyl-3-chlorobenzamide (2n) <sup>1</sup>H NMR (600 MHz, CDCl<sub>3</sub>):**

LSH-1H\_66.f1d  
LSH031802

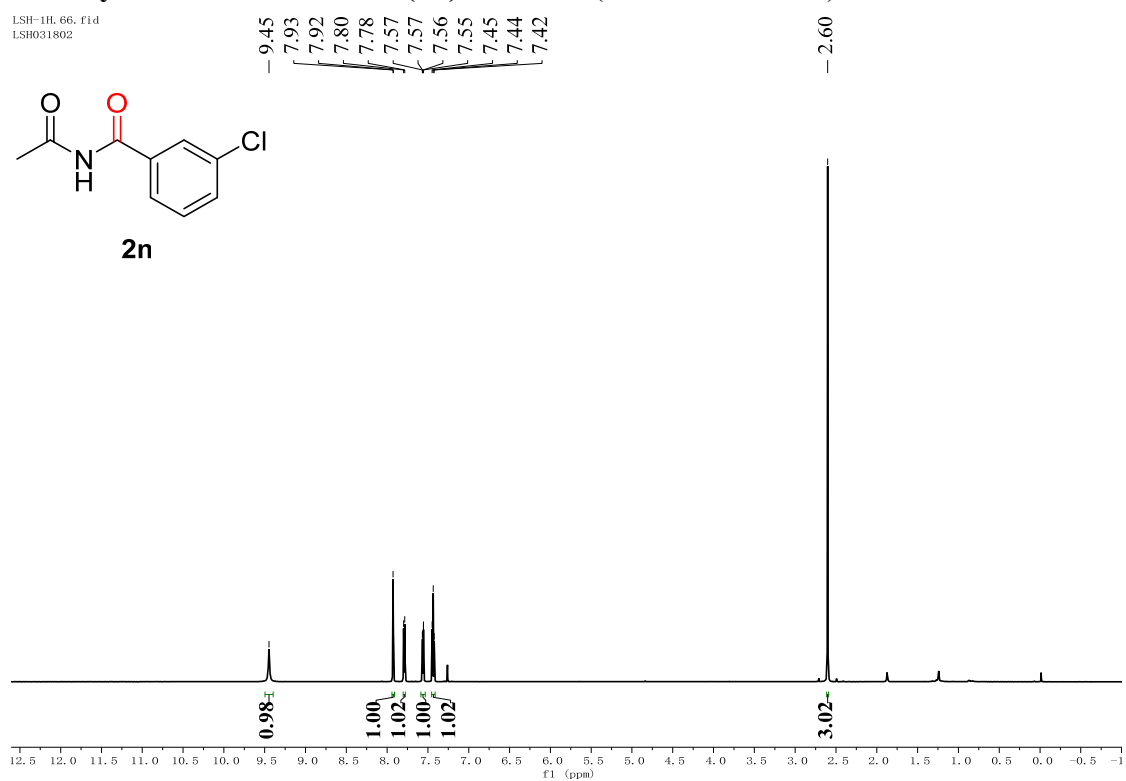

***N*-acetyl-2-chlorobenzamide (2o) <sup>1</sup>H NMR (600 MHz, CDCl<sub>3</sub>):**

LSH-1H\_36.f1d  
LSH030803

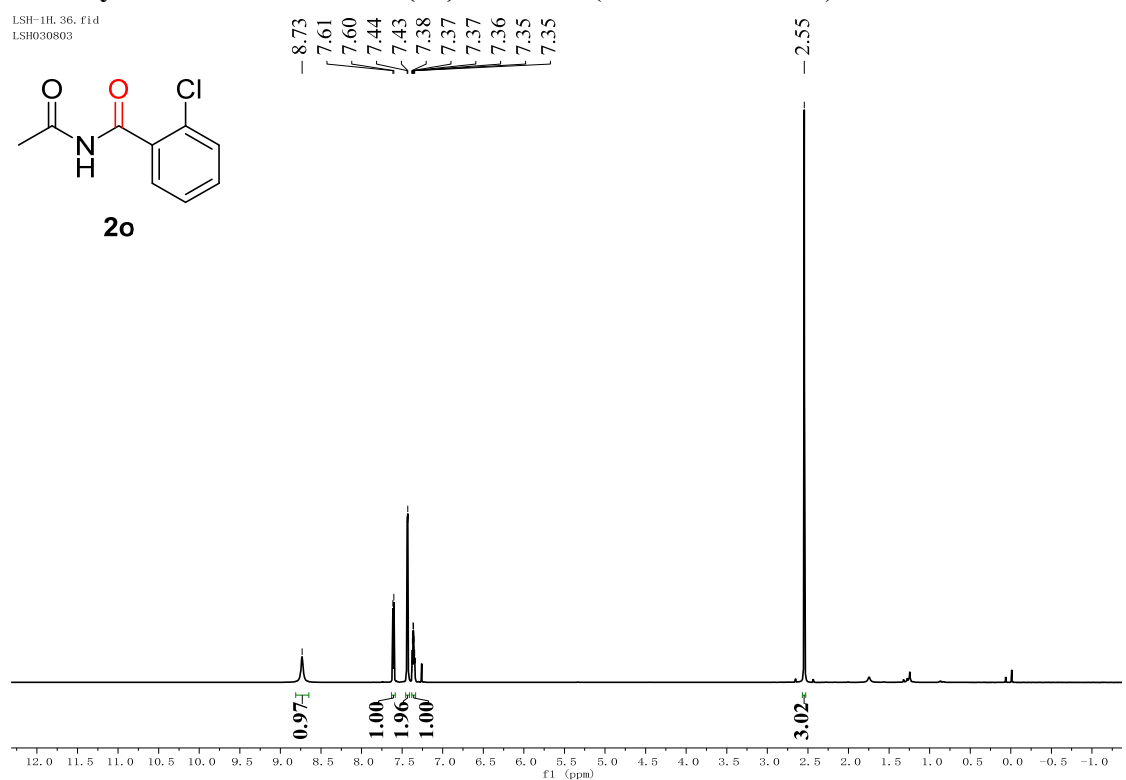

***N*-acetyl-3,4-dichlorobenzamide (2p) <sup>1</sup>H NMR (600 MHz, CDCl<sub>3</sub>):**

LSH-1H\_23.f1d  
LSH 0214702

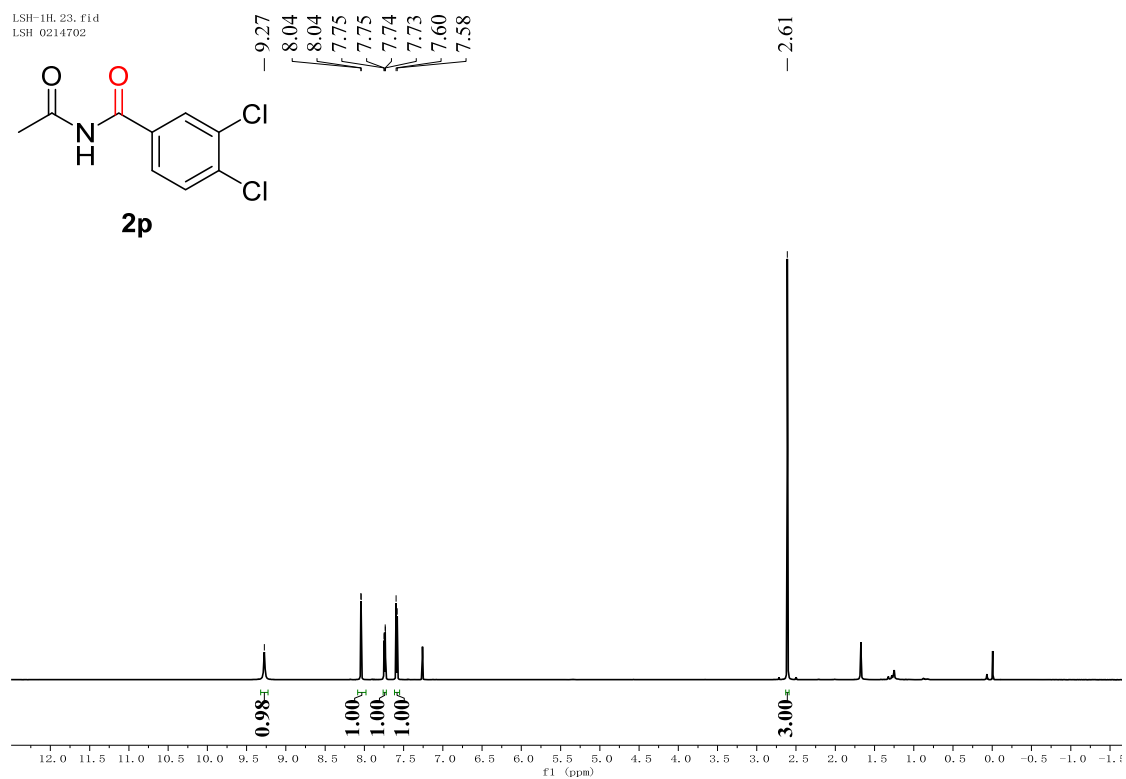

***N*-pivaloylbenzamide (2q) <sup>1</sup>H NMR (600 MHz, CDCl<sub>3</sub>):**

LSH-1H\_49.f1d  
LSH031502

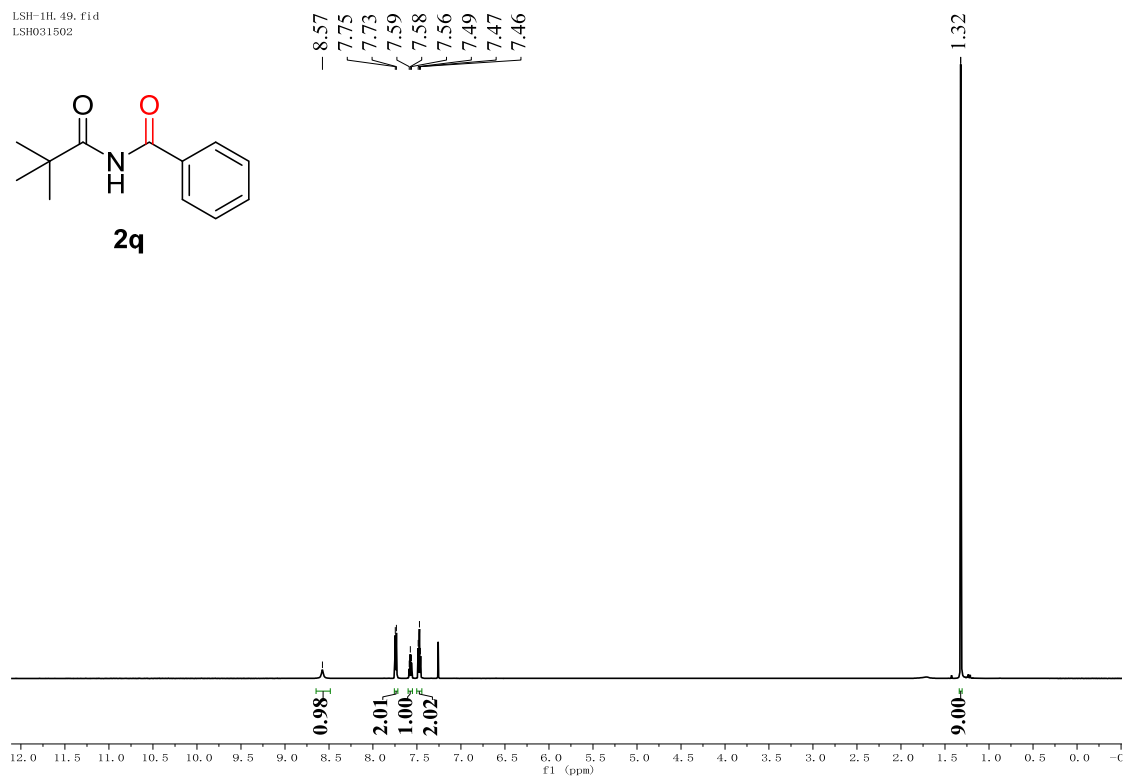

***N*-(methylsulfonyl)benzamide (2r) <sup>1</sup>H NMR (600 MHz, CDCl<sub>3</sub>):**

LSH-1H\_7.fid  
LSH035201

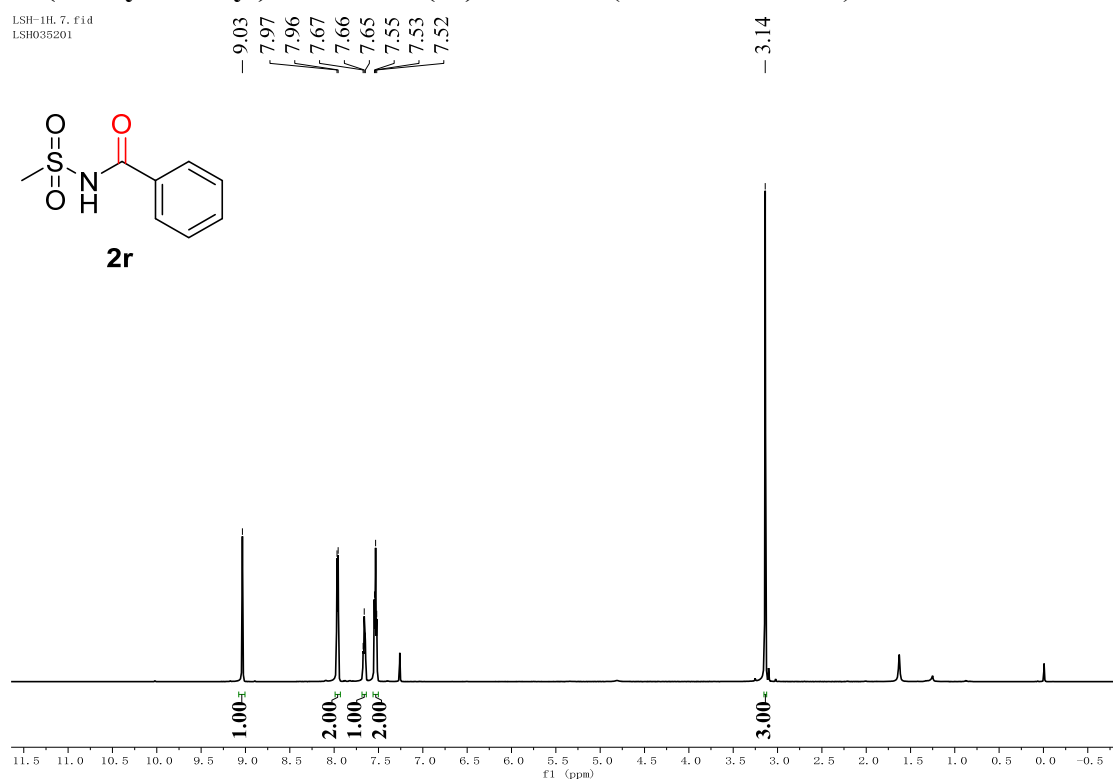

***N*-(phenylsulfonyl)benzamide (2s) <sup>1</sup>H NMR (600 MHz, CDCl<sub>3</sub>):**

LSH-1H\_96.fid  
LSH035001

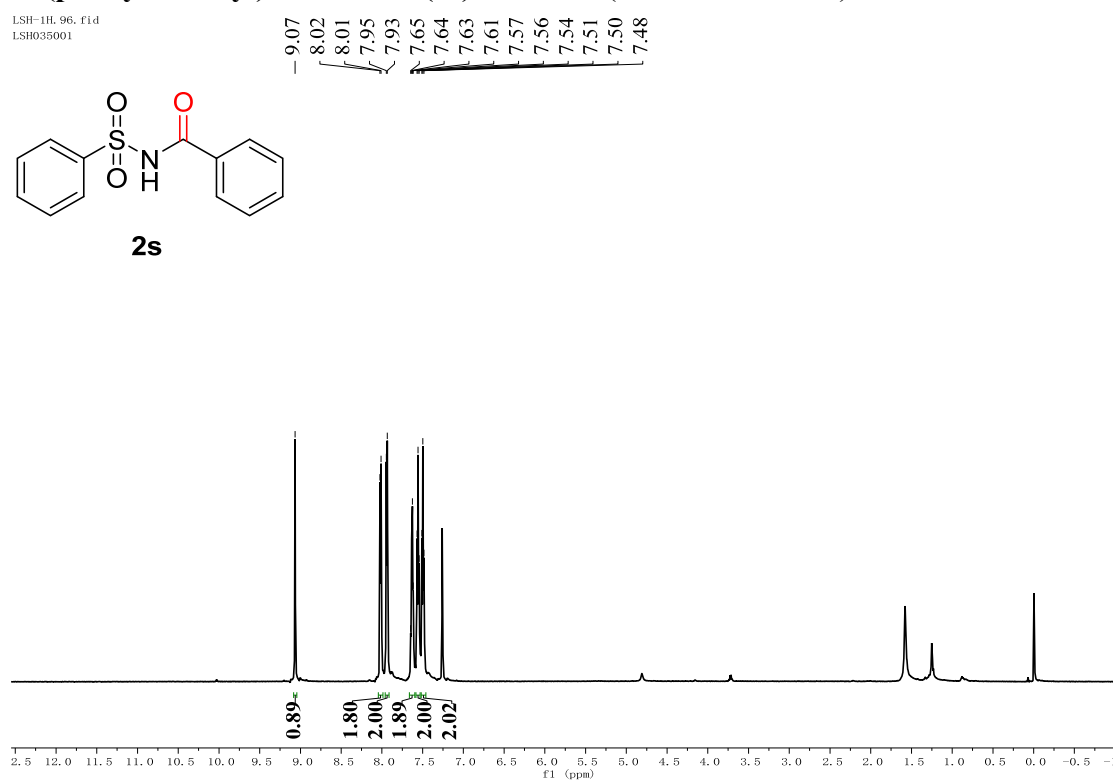

### *N*-formylbenzamide (2t) <sup>1</sup>H NMR (600 MHz, CDCl<sub>3</sub>):

LSH-1H\_19.f1d  
LSH0214401

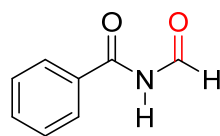

**2t**

9.81  
9.40  
9.39  
7.98  
7.97  
7.67  
7.66  
7.64  
7.56  
7.54  
7.53

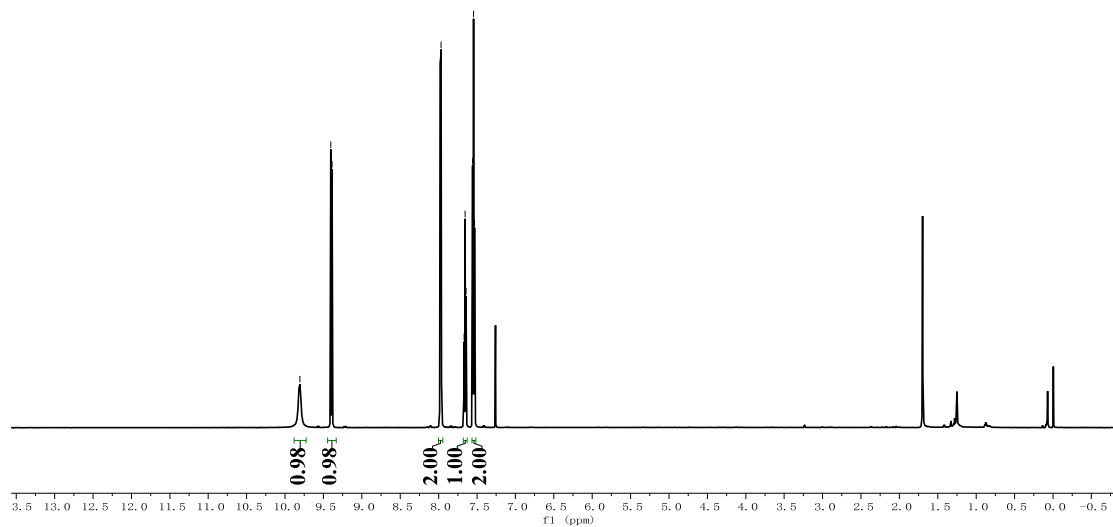

### 4-fluoro-*N*-formylbenzamide (2u) <sup>1</sup>H NMR (600 MHz, CDCl<sub>3</sub>):

LSH-1H\_27.f1d  
LSH030101

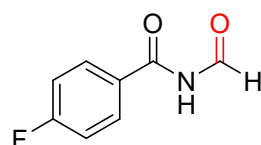

**2u**

9.94  
9.39  
9.37  
8.04  
8.03  
8.02  
7.24  
7.23  
7.21

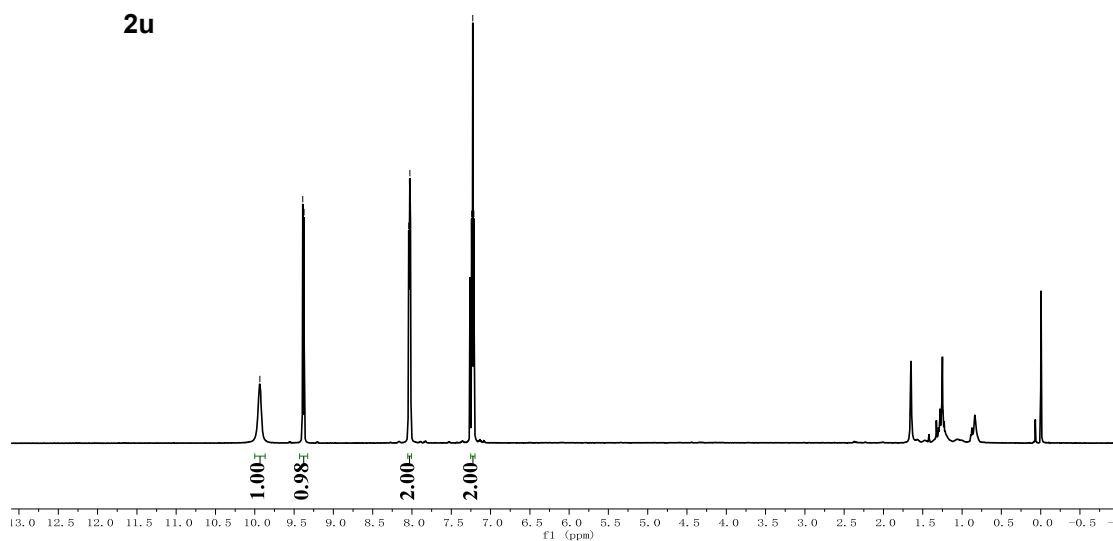

***N*-butyrylhexanamide (2v) <sup>1</sup>H NMR (600 MHz, CDCl<sub>3</sub>):**

LSH-1H.86.f1d  
LSH032403

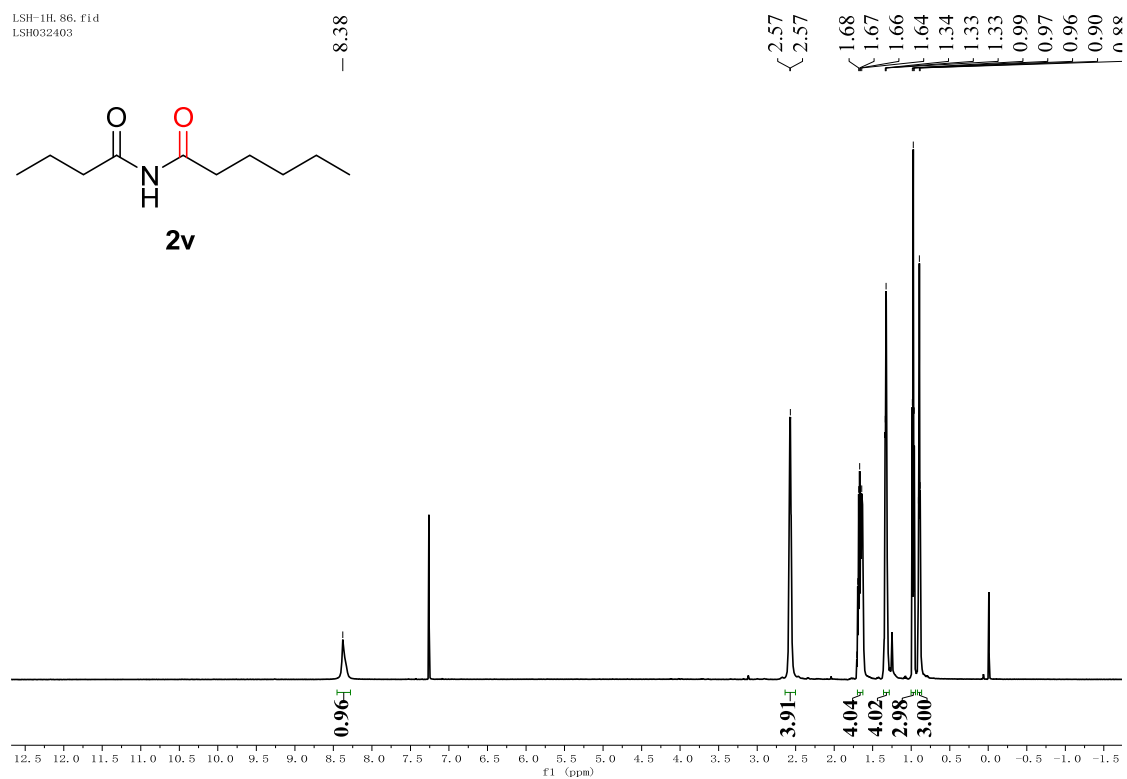

***N*-benzoyl-*N*-methylbenzamide (2w) <sup>1</sup>H NMR (600 MHz, CDCl<sub>3</sub>):**

LSH-1H.89.f1d  
LSH032701

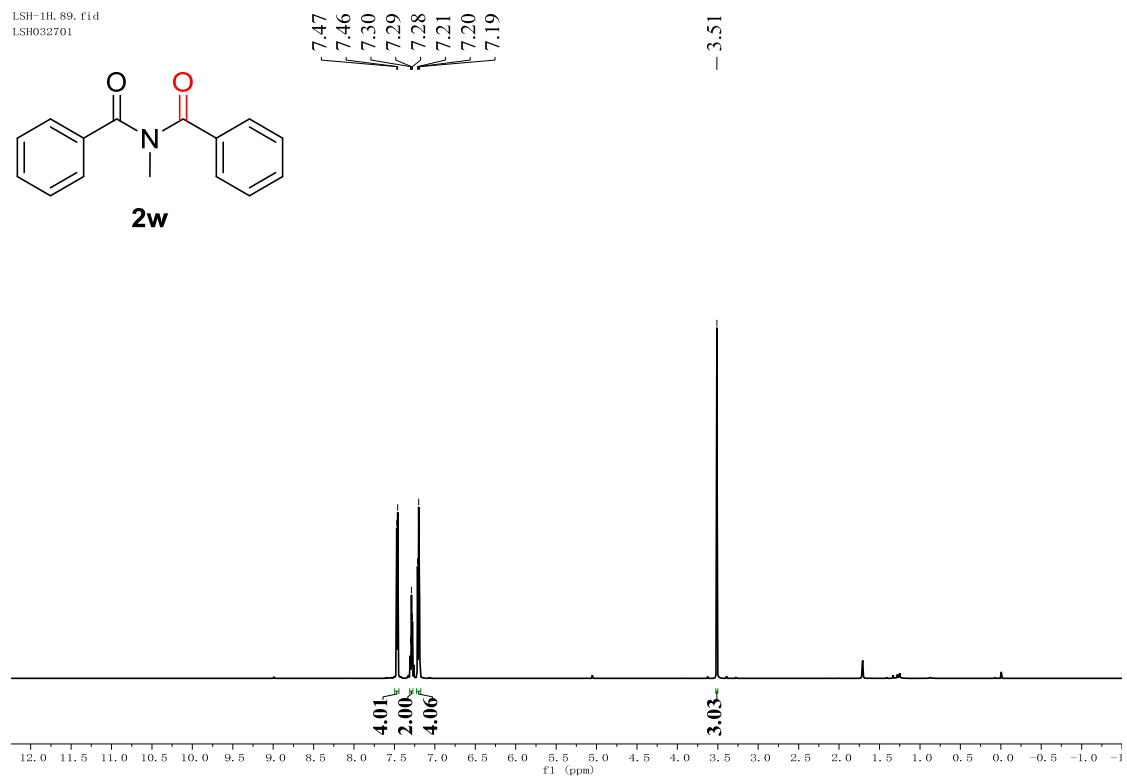

***N*-formyl-*N*-methylbenzamide (2x) <sup>1</sup>H NMR (600 MHz, CDCl<sub>3</sub>):**

LSH-1H\_72.fid  
LSH032103

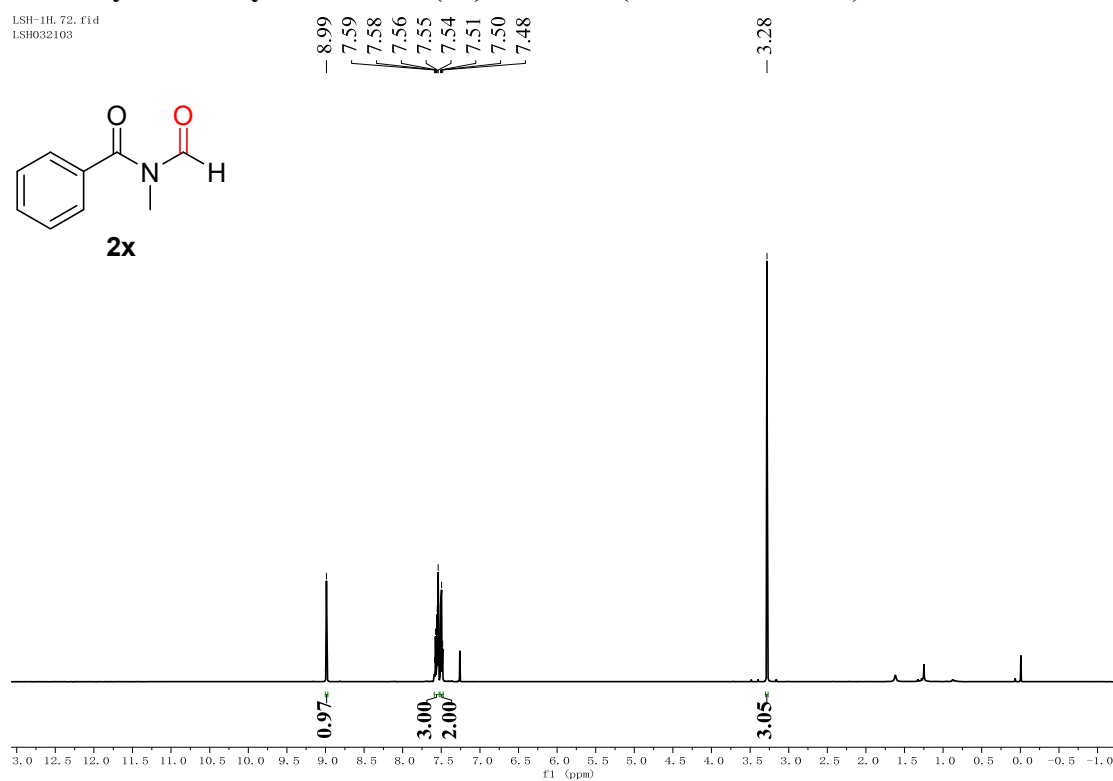

***N*-acetyl-*N*-ethylbenzamide (2y) <sup>1</sup>H NMR (600 MHz, CDCl<sub>3</sub>):**

LSH-1H\_95.fid  
LSH035004

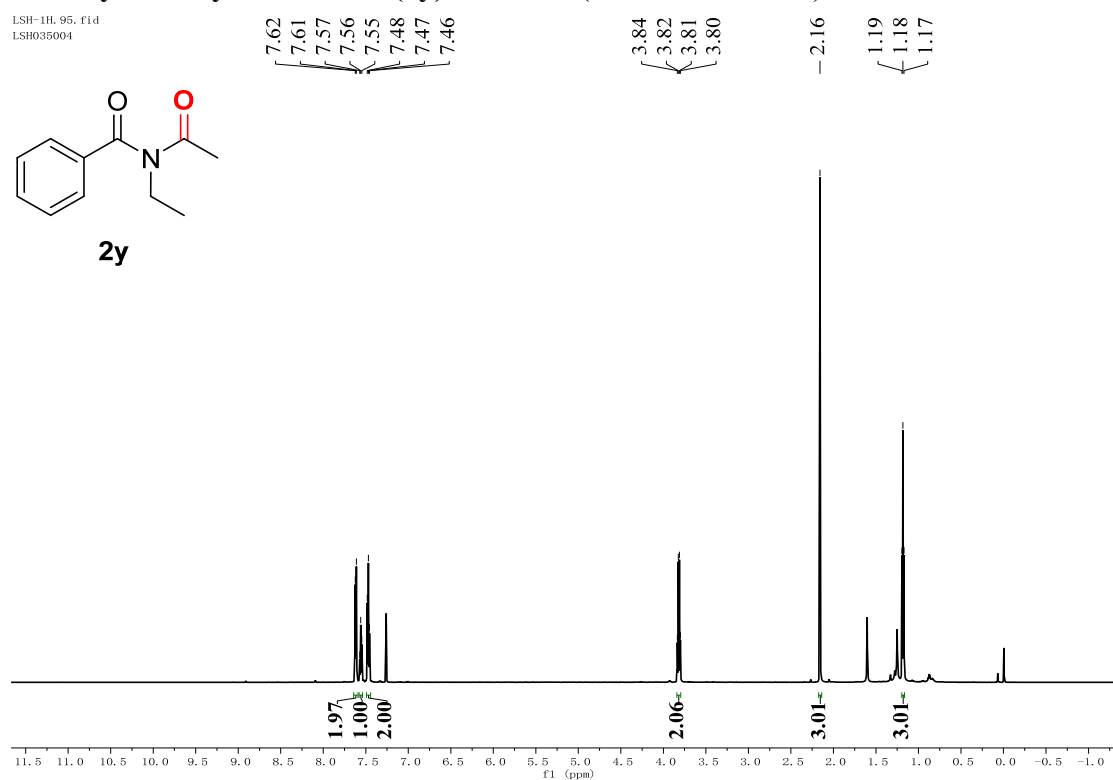

ethyl 2-benzamido-2-oxoacetate (**2z**) <sup>1</sup>H NMR (600 MHz, CDCl<sub>3</sub>):

LSH-1H.3. f1d  
GGX-LSH-15MG

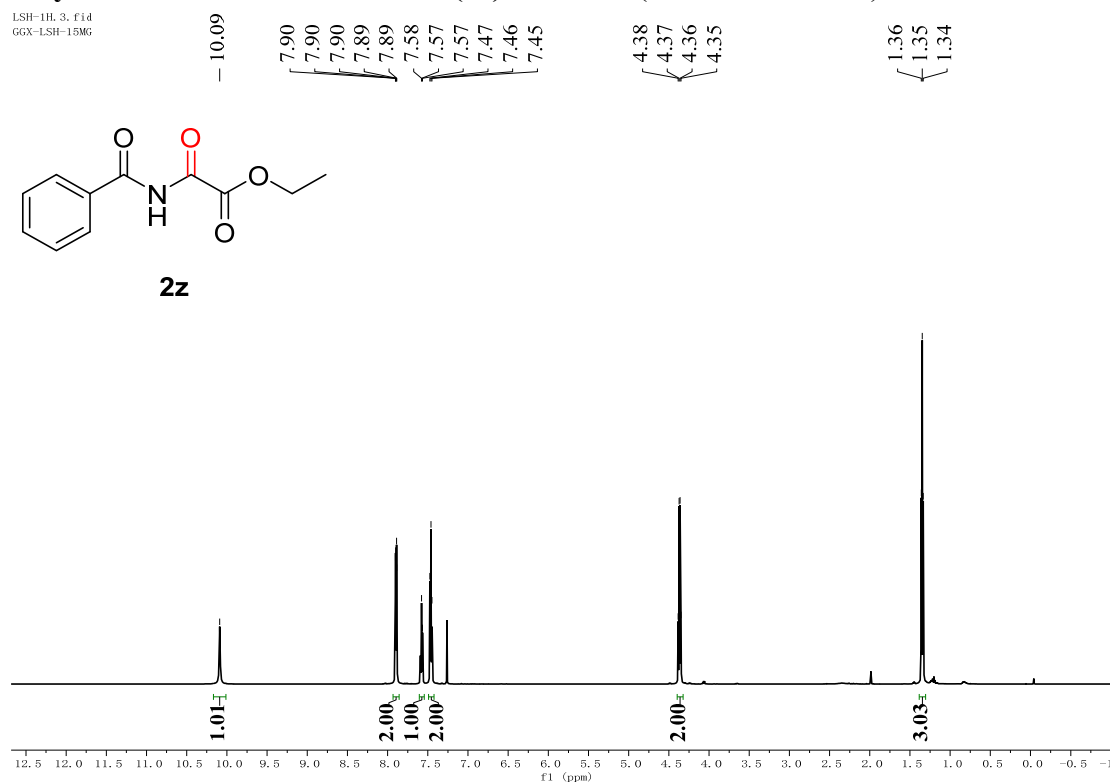

benzoylcarbamoyl cyanide (**2aa**) <sup>1</sup>H NMR (600 MHz, CDCl<sub>3</sub>):

LSH-1H.5. f1d  
LSH043201

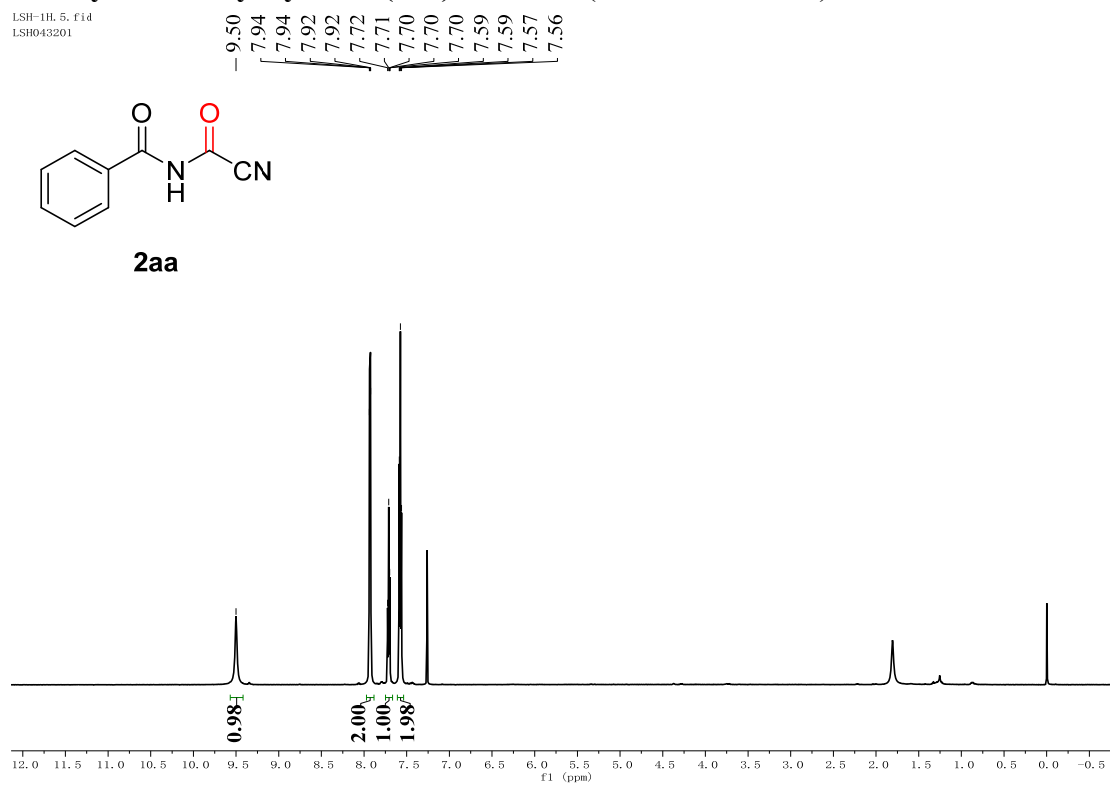

Supplement: d3ob01984e1.pdf [file d3ob01984e1.pdf]
